# Supplementary material for: Physical activity and its correlates in people with cystic fibrosis: a systematic review
Source: PubMed Central journal article supplement — Eur Respir Rev. 2022 Sep 7;31(165):220010. doi: 10.1183/16000617.0010-2022 (PMC9724827; doi:10.1183/16000617.0010-2022), 2022-09-07
Supplement: ERR-0010-2022.SUPPLEMENT.pdf [file ERR-0010-2022.SUPPLEMENT.pdf]

# Supplementary material

## File E1. Methodology

### Search strategy

#### PubMed

(cystic fibrosis OR cystic fibrosis[MeSH Terms]) AND (phys\* acti\* OR "physical inactivity" OR "physical activity level" OR "daily living activity" OR "activities of daily living" OR physical activity[MeSH Terms] OR activities of daily living[MeSH Terms]) AND (Human)

#### Web of Science

(TS=((cystic fibrosis) AND (phys\* acti\* OR "physical inactivity" OR "physical activity level" OR "daily living activity" OR "activities of daily living") AND (Human)))

#### PsycArticles

(cystic fibrosis) AND (phys\* acti\* OR "physical inactivity" OR "physical activity level" OR "daily living activity" OR "activities of daily living") AND (Human)

### Risk of bias

The following adaptations to the NOS scale were made:

- For all studies, item 4 was not scored as it is impossible not to measure PA ("Demonstration that outcome of interest is not present at start study")
- Regarding the first research question item 8 was not scored as a follow up is not needed to explore the difference in PA between patients with CF and healthy peers ("Adequacy of follow up of cohorts")
- Regarding the second research question both item 2 and 5 were not scored because no control group was present ("Selection of non-exposed cohort" and "Comparability of cohorts," respectively).

Table E1. Classifying variables regarding strength of evidence of association

| <b>Studies supporting association (%)</b> | <b>Summary code</b> | <b>Meaning code</b>  |
|-------------------------------------------|---------------------|----------------------|
| 0-33                                      | 0                   | No association       |
| 34-59                                     | ?                   | Indeterminate        |
| 60-100                                    | +                   | Positive association |
|                                           | -                   | Negative association |

Table E2. Characteristics of included studies

| Reference<br>Study design                               | N   | Sex (male),<br>N (%) |            | Age (y),<br>mean<br>(SD)                                    | BMI<br>(kg/m <sup>2</sup> ),<br>mean<br>(SD)                | FEV1<br>(%pred),<br>mean (SD)                               | Selection criteria                                           |                                                                                          | Measure of PA                                                                                                                                                                                     |                                                                                                                                        |
|---------------------------------------------------------|-----|----------------------|------------|-------------------------------------------------------------|-------------------------------------------------------------|-------------------------------------------------------------|--------------------------------------------------------------|------------------------------------------------------------------------------------------|---------------------------------------------------------------------------------------------------------------------------------------------------------------------------------------------------|----------------------------------------------------------------------------------------------------------------------------------------|
|                                                         |     |                      |            |                                                             |                                                             |                                                             | Inclusion                                                    | Exclusion                                                                                | Direct method                                                                                                                                                                                     | Indirect method                                                                                                                        |
| Tejero, S. 2011,<br>Chest<br><br>CS                     | 50  | 23 (46)              |            | 25<br>(19-30) <sup>1^^</sup><br>24<br>(20-27) <sup>1^</sup> | 21<br>(19-23) <sup>1^^</sup><br>21<br>(19-23) <sup>1^</sup> | 47<br>(35-81) <sup>1^^</sup><br>61<br>(33-83) <sup>1^</sup> | – ≥ 16 y<br>– Spain                                          | – Transplant<br>– Antiresorptive<br>medication previous<br>3 y<br>– Clinical instability | <b>SenseWear</b><br>– Outcome: (min/d); PA at diff.<br>I.; daily steps<br>– Classification: LPA, 3 – 4.8<br>METs; MPA, 4.8-7.2 METs; VPA,<br>> 7.2 METs                                           | NA                                                                                                                                     |
| Cox, S. 2019, J<br>Cardiopulm<br>Rehabil Prev<br><br>CS | 47  | 28<br>(60)           |            | 29 (8)                                                      | 22<br>(21-24) <sup>1</sup>                                  | 60<br>(50-82) <sup>1</sup>                                  | – >18 y<br>– Clinical stable<br>– Melbourne,<br>Australia    | NR                                                                                       | <b>SenseWear</b><br>– Outcome: MVPA (min/d)<br>– Classification: MVPA ≥ 4.8<br>METs                                                                                                               | NA                                                                                                                                     |
| Boucher, G. 1997,<br>Am J Phys Med<br>Rehabil<br><br>CS | 36  | 15<br>(42)           |            | 12<br>(4)                                                   | BMP<br>99 (15)                                              | 86<br>(20)                                                  | – 6 - 16 y                                                   | NR                                                                                       | NA                                                                                                                                                                                                | <b>HAES</b><br>– Outcome: (min/d); PA at diff. I.<br>– Classification: inactive;<br>somewhat inactive; somewhat<br>active; very active |
| Jantzen, A. 2016,<br>Pediatr Pulmonol<br><br>CS         | 131 | CF:<br>66            | 37<br>(58) | 11<br>(9-16) <sup>1</sup>                                   | 17<br>(15-21) <sup>1</sup>                                  | 91<br>(73-99) <sup>1</sup>                                  | – > 3 y<br>– Clinical Stable<br>– Germany and<br>Switzerland | – non-CF chronic<br>diseases<br>– (Waiting for) lung<br>transplantation                  | <b>Actigraph GR1M</b><br>– Outcome: (h/d); PA at diff. I.<br>– Classification: (cpm); very low,<br>0-500; low, 501-1000; moderate,<br>1001-2000; strenuous, 2001-<br>4000; very strenuous, > 4001 | NA                                                                                                                                     |
|                                                         |     | HC:<br>65            | 39<br>(60) | 10<br>(7-19) <sup>1</sup>                                   | 17<br>(15-21) <sup>1</sup>                                  | NR                                                          | NR                                                           | NR                                                                                       |                                                                                                                                                                                                   |                                                                                                                                        |
| Gilljam, H. 1990,<br>Respir Med<br><br>CS               | 32  | NR                   |            | 10,5<br>(NR)                                                | NR                                                          | NR                                                          | – 1 - 20 y<br>– Huddinge<br>Hospital                         | – Not living with a<br>family<br>– Lived too far away<br>to be interviewed               | NA                                                                                                                                                                                                | <b>Interview, standard<br/>questionnaire</b><br>– Outcome: # activities/w<br>– Classification: highly active, ≥<br>4; less active, 0-3 |

|                                                  |     |                  |            |                         |           |            |                                                                                   |                                                                                                                                           |                                                                                                                                                                                              |                                                                                                                                                                                                                              |
|--------------------------------------------------|-----|------------------|------------|-------------------------|-----------|------------|-----------------------------------------------------------------------------------|-------------------------------------------------------------------------------------------------------------------------------------------|----------------------------------------------------------------------------------------------------------------------------------------------------------------------------------------------|------------------------------------------------------------------------------------------------------------------------------------------------------------------------------------------------------------------------------|
| Britto,M.T. 2000,<br>Pediater Pulmonol<br><br>CS | NR  | CF:<br>115       | 56<br>(49) | 15<br>(NR) <sup>1</sup> | NR        | NR         | – 12-19 y<br>– Nort Carolina                                                      | NR                                                                                                                                        | NA                                                                                                                                                                                           | <b>YRBS</b><br>– Outcome: VPA (d/w)<br>– Classification: VPA, activities that make you sweat and breathe hard                                                                                                                |
|                                                  |     | HC:<br>NR        | NR         | NR                      | NR        | NR         | – Matched for age, sex, race<br>– North Carolina                                  | NR                                                                                                                                        |                                                                                                                                                                                              |                                                                                                                                                                                                                              |
| Wells,G.D.2008,<br>Pediater Pulmonol<br><br>CS   | 14  | 7<br>(50)        |            | 16<br>(4)               | NR        | 74<br>(19) | – Clinical stable<br>– No AE in preceding 3m<br>– FEV1 > 60%<br>– Toronto, Canada | – Unable to participate in HPA                                                                                                            | <b>Actigraph Model 7164</b><br>– Outcome: (min/d); PA at diff. I.<br>– Classification: (cpm); inactive < 2000; somewhat inactive, 2001-5500; somewhat active, 5501-9500; very active, > 9501 | <b>HAES</b><br>– Outcome: PA at diff. I. (min/d)<br>– Classification: inactive; somewhat inactive; somewhat active; very active<br><b>Activity diary</b>                                                                     |
| Cox, N.S. 2016,<br>Respirology<br><br>LS         | 65  | 34<br>(52)       |            | 28<br>(8)               | 22<br>(3) | 68<br>(20) | – ≥ 18 y<br>– Melbourne, Australia                                                | – IV antibiotics 1m prior to study<br>– Co-morbidities limiting PA<br>– Burkholderia cepacia infection<br>– Pregnant<br>– Lung transplant | <b>SenseWear (n=61)</b><br>– Outcome: MVPA (min/d)<br>– Classification: MPA, 4.8 METs                                                                                                        | NA                                                                                                                                                                                                                           |
| Cherobin, I.A.<br>2018, Clin Respir J<br><br>CS  | 28  | 12<br>(43)       |            | 25<br>(6)               | 21 (3)    | 47<br>(21) | – ≥ 18 y<br>– Porto                                                               | – AE<br>– Any cardiac, orthopedic or trauma complications preventing 6MWT                                                                 | <b>Actigraph GT3X</b><br>– Classification: cpm; LPA, 100-1951 counts; MPA, 1952-5724; VPA, 5725-9498 counts; VVPA, > 9498 counts<br>– Outcome: PA at diff I (min/d); daily steps             | <b>IPAQ</b><br>– Outcome: # participants in diff. PA I.<br>– Classification: high, ≥3d/ w VPA (or combi equivalent to 3000 MET min/w); moderate, ≥ 3d of VPA for ≥20 min (or combi equivalent to 600 MET min/w); low, others |
| Elce,A. 2018,Clin<br>Respir J<br><br>LS          | 118 | CF:<br>59        | 30<br>(51) | 31<br>(NR)              | 22<br>(3) | 64<br>(27) | – > 18 y<br>– Regularly active<br>– Italy                                         | NR                                                                                                                                        | NA                                                                                                                                                                                           | – Reporting type of physical exercise and weekly sessions                                                                                                                                                                    |
|                                                  |     | CF<br>Sed:<br>59 | NR         | 31<br>(NR)              | 22<br>(4) | 62<br>(25) | – Age and sex matched<br>– Not perform exercise last 3 y                          | NR                                                                                                                                        |                                                                                                                                                                                              | NA                                                                                                                                                                                                                           |

|                                                    |    |           |         |         |                      |          |                                                                           |                                                                                                        |                                                                                                                                                                                       |                                             |
|----------------------------------------------------|----|-----------|---------|---------|----------------------|----------|---------------------------------------------------------------------------|--------------------------------------------------------------------------------------------------------|---------------------------------------------------------------------------------------------------------------------------------------------------------------------------------------|---------------------------------------------|
| Mackintosh, K.A. 2018, J Phys Act Health<br><br>CS | 36 | CF: 18    | 10 (56) | 12 (3)  | 19 (3)               | 80 (9)   | – 6-17 y<br>– Mild to moderate CF<br>– Clinically stable<br>– Wales (UK)  | – Unstable non-pulmonary comorbidities<br>– Acute infections                                           | <b>ActiGraph GT3X</b><br>– Outcome: PA at diff I (min/d); daily steps<br>– Classification: (cpm); ST, < 100; LLPA, 100 - 799; HLPa, 800 - < 4 METs; MPA, 4 - 5.99 METs; VPA, > 6 METs | NA                                          |
|                                                    |    | HC: 18    | 10 (56) | 13 (3)  | 21 (4)               | 89 (17)  | – Age and sex matched<br>– Non-clinical<br>– Local schools                | NR                                                                                                     |                                                                                                                                                                                       |                                             |
| Troosters, T. 2009, Eur Respir J<br><br>CS         | 40 | CF: 20    | NR      | 25 (5)  | NR                   | 72 (18)  | – No conditions interfering with testing procedures<br>– Leuven, Belgium  | – AE in last 6w<br>– (waiting for) Lung transplant                                                     | <b>SenseWear (n=20 CF)</b><br>– Outcome: PA at diff I (min/d); daily steps<br>– Classification: LPA, > 3 METs; MPA, > 4.8 METs; VPA, > 7.2 METs                                       | NA                                          |
|                                                    |    | HC: 20    | 11 (55) | 24 (5)  | NR                   | 104 (11) | – Free from chronic diseases<br>– Volunteered to participate in the study | NR                                                                                                     |                                                                                                                                                                                       |                                             |
| Wieboldt, J. 2012, J Cyst Fibros<br><br>LS         | 38 | CF AE: 13 | 11 (85) | 30 (9)  | 21 (3)               | 54 (8)   | Admitted to hospital with AE                                              | – Conditions ↓ mobility<br>– Not expected to be discharged                                             | <b>SenseWear</b><br>– Classification: NA<br>– Outcome: daily steps                                                                                                                    | NA                                          |
|                                                    |    | CF: 25    | 15 (60) | 34 (12) | 22 (2)               | 64 (23)  | – Clinical stable                                                         | NR                                                                                                     |                                                                                                                                                                                       |                                             |
| Ward, N. 2013, Respir Med<br><br>LS                | 24 | 15 (63)   |         | 28 (8)  | 21 (2)               | 53 (16)  | – ≥ 18 y<br>– AE<br>– Royal Adelaide Hospital                             | – Unable to commit to the 1m follow-up measurements<br>– MSS condition<br>– Terminal medical condition | <b>SenseWear Pro3</b><br>– Classification: (1) Troosters et al. ;(2) MPA, 3-6 METs; VPA, 6-9 METs; VVPA, > 9 METs<br>– Outcome: PA in diff. I (min/d); daily steps                    | NA                                          |
| Thobani, A. 2015, Pulm Med<br><br>LS               | 27 | 13 (48)   |         | 32 (12) | 24 (4)               | 78 (23)  | – ≥ 18 y<br>– Ambulatory<br>– Clinical stable                             | – AE<br>– hospitalization                                                                              | <b>DIGI-WALKER (n=24)</b><br>– Outcome: daily steps                                                                                                                                   | NA                                          |
| Nixon, P.A. 2001, Med Sci Sports                   | 60 | CF: 30    | 18 (60) | 11 (3)  | 98 (11) <sup>#</sup> | 96 (24)  | – 7 - 17 y<br>– Pittsburgh                                                | NR                                                                                                     | NA                                                                                                                                                                                    | <b>MAQ</b><br>– Outcome: Total h/w; METH/w; |

|                                                                     |     |           |            |                            |                            |             |                                                                                            |                                                                    |                                                                                                                                              |                                                                                                                                              |
|---------------------------------------------------------------------|-----|-----------|------------|----------------------------|----------------------------|-------------|--------------------------------------------------------------------------------------------|--------------------------------------------------------------------|----------------------------------------------------------------------------------------------------------------------------------------------|----------------------------------------------------------------------------------------------------------------------------------------------|
| Exerc<br>CS                                                         |     | HC:<br>30 | 17<br>(57) | 11<br>(2)                  | 112<br>(21) <sup>#</sup>   | NR          | – Siblings/ friends<br>of CF participants                                                  | NR                                                                 |                                                                                                                                              | vigorous h/w<br>– Classification: VPA > 6 METs                                                                                               |
| Savi,D. 2013,<br>Respir Med<br><br>CS                               | 31  | CF:<br>20 | 15<br>(75) | 33<br>(8)                  | 22<br>(2)                  | 68<br>(16)  | – Adult<br>– Clinical stable<br>– Rome, Italy                                              | – AE, 4w prior to<br>testing<br>– (waiting for) lung<br>transplant | <b>SenseWear</b><br>– Outcome: PA in diff. I (min/d);<br>daily steps<br>– Classification: LPA, >3 METs;<br>MPA, >4.8 METs; VPA, >7.2<br>METs | <b>HAES</b><br>– Classification: inactive;<br>somewhat inactive; somewhat<br>active; very active                                             |
|                                                                     |     | HC:<br>11 | 7<br>(64)  | 30<br>(4)                  | 22<br>(3)                  | 108<br>(11) | – Adult<br>– no CR diseases<br>– Staff/ colleagues<br>from the same<br>hospital            | NR                                                                 |                                                                                                                                              |                                                                                                                                              |
| Baker, C.F. 2006,<br>journal of pediatric<br>nursing<br><br>RCT     | 16  |           | 8<br>(50)  | 14<br>(NR)                 | 18<br>(NR)                 | 80<br>(NR)  | – 12 - 18 y                                                                                | – AE, IV antibiotics<br>1m prior to study                          | NA                                                                                                                                           | <b>30-day PAR</b><br>– Outcome: MET h score<br>– Classification: LPA, < 3 METs;<br>MPA, 3-5.9 METs; hard, 6-8.9<br>METs; very hard, ≥ 9 METs |
| Loutzenhiser, J.K<br>and Clark,R. 1993,<br>J Pediatr Nurs<br><br>CS | 36  |           | 17<br>(48) | 6-19 <sup>§</sup>          | NR                         | 89<br>(28)  | – 6-19 y<br>– CF centers                                                                   | NR                                                                 | NA                                                                                                                                           | <b>7 item Likert Scaled Children's<br/>Activity questionnaire</b><br>– Outcome: total activity score                                         |
| Wieltsback, M.<br>2020, PLoS One<br><br>CS                          | 111 |           | 58<br>(52) | 35<br>(29-41) <sup>2</sup> | 20<br>(18-22) <sup>2</sup> | NR          | – ≥ 15 y<br>– ≥ 6 m after lung<br>transplant<br>– German and/or<br>French<br>– Switzerland | NR                                                                 | NA                                                                                                                                           | <b>IPAQ - SF</b><br>– Outcome: (METmin/w); PA in<br>diff. I                                                                                  |
| Hebestreit, H.<br>2014, BCM Pulm<br>Med<br><br>RCT                  | 76  |           | 39<br>(51) | 21<br>(6)                  | 20<br>(3)                  | 69<br>(19)  | – ≥ 12 y<br>– FEV1 ≥ 35%<br>– Clinical Stable                                              | NR                                                                 | <b>MTI/CSA 7164 accelerometer</b><br>– Outcome: MVPA (h/w)<br>– Classification: MVPA > 1000<br>cpm                                           | <b>7D-PAR</b><br>– Outcome: (h/w); hard; very<br>hard                                                                                        |

|                                                          |     |            |            |                                             |                              |                                               |                                                                  |                                                                                                                  |                                                                                                                                                                             |                                                                                                                                                                                                                                                           |
|----------------------------------------------------------|-----|------------|------------|---------------------------------------------|------------------------------|-----------------------------------------------|------------------------------------------------------------------|------------------------------------------------------------------------------------------------------------------|-----------------------------------------------------------------------------------------------------------------------------------------------------------------------------|-----------------------------------------------------------------------------------------------------------------------------------------------------------------------------------------------------------------------------------------------------------|
| Hebestreit, H.<br>2006, Eur Respir J<br><br>CS           | 71  | 35<br>(49) |            | 21<br>(6)                                   | NR                           | 66<br>(21)                                    | – 12 - 40 y<br>– Clinical Stable<br>– Germany and<br>Switzerland | – Medical problems<br>precluding max.<br>exercise testing                                                        | <b>MTI/CSA 7164 accelerometer</b><br>– Classification: MVPA > 1000<br>cpm<br>– Outcome: MVPA (h/w)                                                                          | NA                                                                                                                                                                                                                                                        |
| Rasekaba, T.M.<br>2013, J Cyst Fibros<br><br>CS          | 136 | CF:<br>101 | NR<br>(55) | 29<br>(9)                                   | 22<br>(4)                    | 60<br>(23)                                    | – ≥18 y<br>– Clinical stable<br>– Melbourne,<br>Australia        | NR                                                                                                               | NA                                                                                                                                                                          | <b>IPAQ</b><br>– Outcome: PA (MET min/w) in<br>work, transport, domestic and<br>leisure<br>– Classification: IPAQ scoring<br>protocol                                                                                                                     |
|                                                          |     | HC:<br>35  | NR<br>(31) | 32<br>(10)                                  | 23<br>(3)                    | 101<br>(130)                                  | – ≥18 y<br>– No underlying CR<br>condition                       | NR                                                                                                               |                                                                                                                                                                             |                                                                                                                                                                                                                                                           |
| Tejero, S. 2016,<br>Braz J Phys Ther<br><br>CS           | 50  | 23<br>(46) |            | 24<br>(19-28) <sup>1</sup>                  | 20,5<br>(19-22) <sup>1</sup> | 60<br>(35-81) <sup>1</sup>                    | – >16 y                                                          | – (waiting for) Lung<br>transplant<br>– AE, antibiotics<br>within 6w prior to<br>study                           | <b>SenseWear</b><br>– Classification: LPA > 3 MET;<br>MPA > 4,8 MET; VPA > 7,2 METs<br>– Outcome: PA at diff. I (min/d);<br>daily steps                                     | NA                                                                                                                                                                                                                                                        |
| Aznar, S. 2014, J<br>Cyst Fibros<br><br>CS               | 86  | CF:<br>47  | 24<br>(51) | 12<br>(3)                                   | 19<br>(3)                    | NR                                            | – 6-17 y<br>– Madrid                                             | – FEV1 < 50%<br>– clinically unstable<br>– Burkholderia<br>cepacia infection<br>– condition<br>impairing testing | <b>Actigraph GT3X</b><br>– Classification: by Evenson et al:<br>ST 0-100 cpm, LPA 101-2295<br>cpm; MPA 2296-4011 cpm; VPA<br>> 4012 cpm<br>– Outcome: PA at diff. I (min/d) | NA                                                                                                                                                                                                                                                        |
|                                                          |     | HC:<br>39  | 23<br>(59) | 12<br>(2)                                   | 20<br>(2)                    | NR                                            | – age - and sex<br>matched<br>– Madrid                           | NR                                                                                                               |                                                                                                                                                                             |                                                                                                                                                                                                                                                           |
| Schneiderman-<br>Walker, J. 2005, J<br>Pediatr<br><br>LS | 109 | 53<br>(49) |            | 12 (3) <sup>^^</sup><br>12 (3) <sup>^</sup> | NR                           | 84 (17) <sup>^^</sup><br>84 (18) <sup>^</sup> | – 7-17 y<br>– Montreal                                           | NR                                                                                                               | NA                                                                                                                                                                          | <b>HAES</b><br>– Outcome: (h/d); inactive;<br>somewhat inactive; somewhat<br>active; very active<br><b>Activity Diary</b><br>– Outcome: (h/d); PA at diff. I.<br>– Classification: MPA, spent in I<br>categories 4 to 5; VPA spent in I<br>categories 6-9 |

|                                              |     |                      |                           |                           |                             |                                                                                |                                                                                                                                              |                                                                                                                                                |                                                                                            |
|----------------------------------------------|-----|----------------------|---------------------------|---------------------------|-----------------------------|--------------------------------------------------------------------------------|----------------------------------------------------------------------------------------------------------------------------------------------|------------------------------------------------------------------------------------------------------------------------------------------------|--------------------------------------------------------------------------------------------|
| Paranjape, S.M. 2012, J Cyst Fibros<br>RCT   | 78  | 45<br>(58)           | 10<br>(6-16) <sup>1</sup> | 56<br>(2-96) <sup>1</sup> | 99<br>(32-132) <sup>1</sup> | – 6 - 16 y<br>– Ability to perform exercise                                    | – >10% ↓ in FEV1 compared to previous clinic visit<br>– AE, oral or IV antibiotics                                                           | NA                                                                                                                                             | <b>HAES</b><br>– Outcome: % of time engaged in M(V)PA                                      |
| Quon, B.S. 2012, J Cyst Fibros.<br>CS        | 30  | 13<br>(43)           | 22<br>(7)                 | NR                        | 57<br>(25)                  | – ≥ 12 y<br>– Washington and Seattle                                           | – Transplantation                                                                                                                            | <b>New-Lifestyles Digi-Walker Pedometer (Model SW-401)</b><br>– Outcome: daily steps                                                           | NA                                                                                         |
| Savi, D. 2015, BCM Pulm Med<br>LS            | 60  | 35<br>(58)           | 34<br>(11)                | 23<br>(3)                 | 73<br>(20)                  | – ≥ 18 y<br>– Rome, Italy and London, UK                                       | – AE within 1m prior to study<br>– (waiting for) lung transplant                                                                             | <b>SenseWear Pro3</b><br>– Output: PA at diff. I (min/d); daily steps<br>– Classification: LPA, 3-4.8 METs; MPA, 4.8-7.2 METs; VPA, >7.8 METs  | NA                                                                                         |
| Schneiderman, J.E. 2014, Eur Respir J.<br>LS | 212 | 104<br>(49)          | 12<br>(3)                 | NR                        | 86<br>(17)                  | – 7 - 17 y<br>– Toronto, Canada                                                | NR                                                                                                                                           | NA                                                                                                                                             | <b>HAES</b><br>– Outcome: (h/d); inactive; somewhat inactive; somewhat active; very active |
| Savi, D. 2018, BCM Pulm Med<br>CS            | 34  | DH: 24<br>NR (79)    | 34<br>(9)                 | 23<br>(2)                 | 68<br>(19)                  | – ≥ 18 y<br>– FEV1 ≥ 80% or 40-80%<br>– Rome, Italy                            | – Clinically unstable<br>– Other disorders that could interfere with exercise testing<br>– Oxygen therapy<br>– (waiting for) lung transplant | <b>SenseWear Pro3</b><br>– Output: PA at diff. I (min/d); daily steps<br>– Classification: LPA, 3-4.8 METs; MPA, 4.8-7.2 METs; VPA, > 7.8 METs | NA                                                                                         |
| Savi, D. 2015, BCM Pulm Med<br>CS            | 45  | CF: 30<br>20<br>(67) | 33<br>(9)                 | 23<br>(3)                 | 71<br>(19)                  | – FEV1 50-90%<br>– Rome, Italy                                                 | – Clinically unstable<br>– Other disorders interfering with testing<br>– (Waiting for) lung transplantation                                  | <b>SenseWear Pro3</b><br>– Output: PA at diff. I (min/d); daily steps<br>– Classification: LPA, 3-4.8 METs; MPA, 4.8-7.2 METs; VPA, > 7.8 METs | NA                                                                                         |
|                                              |     | HC: 15<br>10<br>(67) | 29<br>(5)                 | 24<br>(3)                 | 109<br>(11)                 | – FEV1 ≥ 80% and FEV1/FVC ≥ 0,7<br>– staff and colleagues of the same hospital | NR                                                                                                                                           |                                                                                                                                                |                                                                                            |

|                                                      |    |                 |            |                                              |                                             |                                              |                                                                |                                                                                         |                                                                                                                                                                                          |                                                                                                                                                                                                                  |
|------------------------------------------------------|----|-----------------|------------|----------------------------------------------|---------------------------------------------|----------------------------------------------|----------------------------------------------------------------|-----------------------------------------------------------------------------------------|------------------------------------------------------------------------------------------------------------------------------------------------------------------------------------------|------------------------------------------------------------------------------------------------------------------------------------------------------------------------------------------------------------------|
| Ruf, K.C. 2012,<br>BMC Med Res<br>Methodol<br><br>CS | 41 | 18<br>(44)      |            | 16 (5) <sup>^^</sup><br>17 (6) <sup>^</sup>  | NR                                          | 76 (21) <sup>^^</sup><br>78 (6) <sup>^</sup> | – ≥ 12 y<br>– Wuerzburg,<br>Germany and<br>Zurich Switzerland  | – Multiresistant<br>bacetria<br>– AE                                                    | <b>ActiGraph GT1M</b><br>– Outcome: : PA at diff. I (min/d)<br>– Classification: (cpm); MVPA, ≥<br>1000; MPA, 1000-1999; VPA, ≥<br>2000                                                  | <b>7D PAR</b><br>– Outcome: (min/d);<br>"moderate", "hard" and "very<br>hard"<br><b>HAES</b><br>– Outcome: (min/d); somewhat<br>active; active<br><b>LRC</b><br>– Outcome: 1, very low active; 4,<br>high active |
| Mackintosh, K.A.<br>2019, J Sports Sci<br><br>CS     | 43 | CF:<br>21       | 24<br>(56) | 12<br>(3)                                    | 19<br>(3)                                   | 80<br>(10)                                   | – 7-17 y<br>– Mild to<br>moderate CF<br>– Clinically stable    | – Unstable non-<br>pulmonary<br>comorbidities<br>– Acute infections                     | <b>ActiGraph GT3X</b><br>– Outcome: (min/d); PA at diff. I;<br>daily steps<br>– Classification: (cpm); ST, 100;<br>LPA, >100 to the MPA cut point;<br>MPA, 4-5.66 METs; VPA, ≥ 6<br>METs | NA                                                                                                                                                                                                               |
|                                                      |    | HC:<br>22       |            | 12<br>(3)                                    | 19<br>(4)                                   | 92<br>(14)                                   | – Age - and sex<br>matched<br>– Local schools                  | NR                                                                                      |                                                                                                                                                                                          |                                                                                                                                                                                                                  |
| Burtin, C. 2013,<br>Resp Research<br><br>LS          | 29 | AE<br>CF:<br>19 | 13<br>(63) | 25<br>(6)                                    | 21<br>(3)                                   | 55<br>(19)                                   | – Adult<br>– AE<br>– Leuven, Belgium                           | NR                                                                                      | <b>SenseWear Pro</b><br>– Outcome: (min/d); PA at diff. I;<br>daily steps<br>– PA classification: MPA, > 4.8<br>METs                                                                     | NA                                                                                                                                                                                                               |
|                                                      |    | CF:<br>10       | 6<br>(60)  | 29<br>(8)                                    | 20<br>(2)                                   | 72<br>(22)                                   | – Clinically stable                                            |                                                                                         |                                                                                                                                                                                          |                                                                                                                                                                                                                  |
| Bhudhikanok, G.S.<br>1996, pediatrics<br><br>CS      | 49 | 19<br>(39)      |            | 19 (10) <sup>^^</sup><br>22 (9) <sup>^</sup> | 19 (3) <sup>^^</sup><br>18 (3) <sup>^</sup> | NR                                           | – > 8 y<br>– Stanford                                          | NR                                                                                      | NA                                                                                                                                                                                       | <b>3 day activity diary + self-report</b><br>Outcome: (non-) weight-bearing<br>exercise (h/w)                                                                                                                    |
| Groeneveld I.F.<br>2012, Qual Life Res<br><br>CS     | 28 | 14 (50)         |            | 12<br>(3)                                    | 47<br>(26) <sup>°</sup>                     | 85<br>(21)                                   | – 6-17 y<br>– Clinical Stable<br>– Low to moderate<br>severity | – FEV1 < 40%<br>– Hospitalization<br>previous 3m<br>– burkholderia<br>Cepacia infection | <b>ActiGraph 7164</b><br>Outcome: cpm<br>Classification: NR                                                                                                                              |                                                                                                                                                                                                                  |

|                                                       |     |            |                            |                                             |                                             |                                             |                                                                                                                                       |                                                                                                                    |                                                                                                                                                                                                                                                                                                                                     |                                                      |
|-------------------------------------------------------|-----|------------|----------------------------|---------------------------------------------|---------------------------------------------|---------------------------------------------|---------------------------------------------------------------------------------------------------------------------------------------|--------------------------------------------------------------------------------------------------------------------|-------------------------------------------------------------------------------------------------------------------------------------------------------------------------------------------------------------------------------------------------------------------------------------------------------------------------------------|------------------------------------------------------|
| Orava, C. 2018, physiotherapy Canada<br><br>CS        | 22  | 10<br>(46) | 33<br>(18-67) <sup>1</sup> | 22<br>(18-28) <sup>1</sup>                  | 64<br>(27-100) <sup>1</sup>                 | – > 18 y<br>– Toronoto                      | – AE, oral or IV antibiotics 1m prior to study<br>– (waiting for) Lung transplant                                                     | NA                                                                                                                 | <b>HAES</b><br>– Outcome: (h/d); inactive; somewhat inactive; somewhat active; very active<br>– Classification: very active, sweating, dramatic increase in HR and heavy breathing; somewhat active, movement and increased HR; somewhat inactive, any activity performed sitting down; inactive, any activity performed lying down |                                                      |
| Currie, S. 2017, physiotherapy Canada<br><br>CS       | 18  | 10<br>(56) | 41<br>(9)                  | 23<br>(3)                                   | 58<br>(21)                                  | – > 18 y<br>– diagnosed CFRD<br>– Toronto   | – transplant<br>– no English<br>– IV antibiotics/corticost eroid 3m prior to study<br>– liver disease<br>– pregnant<br>– hospitalized | NA                                                                                                                 | <b>7D PAR</b><br>– Outcome: PA (MET min/w)<br>– Classification: sleep, 1 MET; LPA, 1.5 METs; MPA, 4 METs; VPA, 6 METs; VVPA, 10 METs                                                                                                                                                                                                |                                                      |
| Kilbride, E. 2012, ISRN pulmonoly<br><br>CS           | 115 | CF: 16     | 9<br>(56)                  | 11 (0) <sup>^^</sup><br>11 (0) <sup>^</sup> | 18 (1) <sup>^^</sup><br>17 (2) <sup>^</sup> | 84 (3) <sup>^^</sup><br>82 (4) <sup>^</sup> | – <b>10 - 12 y</b><br>– Dublin                                                                                                        | NR                                                                                                                 | <b>triaxial accelerometer</b><br>– Classification: (cpm); inactive 0-99; LPA, 100-970; MPA, 971-2333; VPA, > 2334<br>– Outcome: % of total time worn                                                                                                                                                                                | <b>MAQ</b><br>– Outcome: PA (MET h/d)                |
|                                                       |     | HC: 99     | 47<br>(47)                 | 11 (0) <sup>^^</sup><br>11 (0) <sup>^</sup> | 19 (0) <sup>^^</sup><br>20 (1) <sup>^</sup> | 92 (1) <sup>^^</sup><br>90 (1) <sup>^</sup> | – Primary schools<br>– Dublin                                                                                                         | NR                                                                                                                 |                                                                                                                                                                                                                                                                                                                                     |                                                      |
| Swisher A,K. 2007, Cardiopulm Phys Ther<br><br>CS     | 55  | CF: 31     | 14<br>(45)                 | 12<br>(4)                                   | 17<br>(3)                                   | 78<br>(25)                                  | – <b>5-18 y</b><br>– West Virginia                                                                                                    | – > pulmonary symptoms in previous m                                                                               | NA                                                                                                                                                                                                                                                                                                                                  | <b>MAQ for adolescents</b><br>– Outcome: PA (METH/w) |
|                                                       |     | HC: 24     | 14<br>(58)                 | 10<br>(4)                                   | 19<br>(3)                                   | 94<br>(14)                                  | – free of any CP disease                                                                                                              | NR                                                                                                                 |                                                                                                                                                                                                                                                                                                                                     |                                                      |
| Burton, K. 2019, physio theory and practice<br><br>LS | 31  | 18<br>(56) | 29<br>(18-62) <sup>1</sup> | 22<br>(4)                                   | 59<br>(23)                                  | – > 18 y<br>– AE in hospital<br>– Brisbane  | – < 18 y<br>– pregnant<br>– home based IV antibiotics                                                                                 | <b>SenseWear</b><br>– Classification: MPA, > 3 MET<br>– Outcome: daily average METs; MPA (h/d; min/d); daily steps | NA                                                                                                                                                                                                                                                                                                                                  |                                                      |

|                                                                                |     |            |            |                   |           |                                                                    |                                                                |                                                                                            |                                                                                                                                         |                                                                                                                                                                                                                                                                             |
|--------------------------------------------------------------------------------|-----|------------|------------|-------------------|-----------|--------------------------------------------------------------------|----------------------------------------------------------------|--------------------------------------------------------------------------------------------|-----------------------------------------------------------------------------------------------------------------------------------------|-----------------------------------------------------------------------------------------------------------------------------------------------------------------------------------------------------------------------------------------------------------------------------|
| Cherobin, I.A. 2016<br><br>CS                                                  | 62  | CF:<br>31  | 11<br>(35) | 26<br>(9)         | 21<br>(2) | 55<br>(21)                                                         | – > 15 y<br>– stable<br>– Porto Algere,<br>Southern Brazil     | – pregnant<br>– conditions<br>impairing testing                                            | NA                                                                                                                                      | <b>IPAQ</b><br>– Outcome: PA (METmin/w)<br>during work, at home, transport<br>and leisure time<br>– Classification: high I; VPA ≥<br>3d/w or combi equivalent to<br>3000 MET min/w; moderate I:<br>VPA ≥ 3d/w for ≥ 20 min or<br>combi of 600 MET min/week;<br>others low I |
|                                                                                |     | HC:<br>31  | NR<br>(NR) | 26<br>(9)         | 23<br>(3) | 93<br>(12)                                                         | – age, sex and<br>ethnicity matched                            | – pregnant<br>– acute respi.<br>symptoms<br>– smoking<br>– conditions<br>impairing testing |                                                                                                                                         |                                                                                                                                                                                                                                                                             |
| Buntain H.M.<br>2003, thorax<br><br>CS                                         | 302 | CF:<br>153 | 84<br>(55) | 5-56 <sup>§</sup> | NR        | Children<br>84 (15)<br>Adolescents<br>78 (24)<br>Adults<br>57 (20) | – > 5 y<br>– Brisbane                                          | NR                                                                                         | NA                                                                                                                                      | <b>physical activity questionnaire<br/>for older children</b><br>Outcome: total activity score<br><br><b>interview</b><br>– Outcome: PA (h) and ST (h)                                                                                                                      |
|                                                                                |     | HC:<br>149 | 66<br>(44) | 6-48 <sup>§</sup> | NR        | NR                                                                 | – local schools and<br>friends                                 | – chronic illness<br>affecting BMD<br>– a period of<br>immobility ≥ 2w in<br>preceding 12m |                                                                                                                                         |                                                                                                                                                                                                                                                                             |
| Valencia-Peris A.<br>2021, Int. J.<br>Environ. Res.<br>Public Health<br><br>CS | 89  | CF:<br>44  | 20<br>(45) | 11 (3)            | 18 (3)    | NR                                                                 | – 6-17 y                                                       | – FEV1% < 30<br>– Clinically unstable<br>– Any condition<br>impairing exercise<br>testing  | <b>ActiGraph GT3X</b><br>Outcome: PA at diff. I (min/d); ST<br>Classification: (cpm); LPA, 100-<br>2219; MPA, 2220-4135; VPA, ><br>4136 | <b>Sport participation</b><br>– Free questions                                                                                                                                                                                                                              |
|                                                                                |     | HC:<br>45  | 21<br>(47) | 11 (3)            | 19 (3)    | NR                                                                 | – sex, age and SES<br>matched                                  | NR                                                                                         |                                                                                                                                         |                                                                                                                                                                                                                                                                             |
| McNarry MA.<br>2021, Pediatr<br>Pulmonol<br>CS                                 | 56  | CF:<br>28  | NR         | 12 (3)            | 19 (3)    | 82 (12)                                                            | – children and<br>adolescents                                  | – Unstable<br>nonpulmonary<br>comorbidities<br>Acute infections                            | <b>ActiGraph GT3X</b><br>Outcome: PA at diff. I (min/d); ST<br>Classification: Hildebrand et al.<br>equation                            | NA                                                                                                                                                                                                                                                                          |
|                                                                                |     | HC:<br>28  | NR         | 12 (3)            | 18 (2)    | 98 (11)                                                            | – sex and age<br>matched<br>– Free from any<br>chronic disease | NR                                                                                         |                                                                                                                                         |                                                                                                                                                                                                                                                                             |

AE, acute pulmonary exacerbation; BMI, body mass index; BMP, body mass percentile; CP, cardiopulmonary; cpm, counts per minute; CS, cross-sectional study; CV, cardiovascular; d, day; diff., different; h, hour; HAES, habitual activity estimation scale; I, intensity; IPAQ, international physical activity questionnaire; IV, intravenous; LPA, light physical activity; LRC, lipid research clinics; LS, longitudinal study; m, months; MAQ, modifiable activity questionnaire; MET, metabolic equivalent of task; min, minute; MPA, moderate physical activity; MSS, musculoskeletal; MVPA, moderate-to-vigorous physical activity; NA, not applicable; NR, not reported; PA, physical activity; PAR, physical activity recall questionnaire; RCT, randomized controlled trial; ST, sedentary time; (V)VPA, (very) vigorous physical activity; w, weeks; y, year; YRBS, Youth Risk Behavior Survey; °, BMI percentile; \$, range; 1, median (interquartile range); #, % predicted; ^^, male; ^, female; >, more; <, less

Table E3. Results of included studies for research question 1

| Reference                                | Variable      | Results                                                                                                                                                                                                                                                                                                                                                                            |                                                                                                                                                                                                                                                                                                                                                                                                                                                                                                                 |
|------------------------------------------|---------------|------------------------------------------------------------------------------------------------------------------------------------------------------------------------------------------------------------------------------------------------------------------------------------------------------------------------------------------------------------------------------------|-----------------------------------------------------------------------------------------------------------------------------------------------------------------------------------------------------------------------------------------------------------------------------------------------------------------------------------------------------------------------------------------------------------------------------------------------------------------------------------------------------------------|
|                                          |               | significant                                                                                                                                                                                                                                                                                                                                                                        | non-significant                                                                                                                                                                                                                                                                                                                                                                                                                                                                                                 |
| Children and adolescents                 |               |                                                                                                                                                                                                                                                                                                                                                                                    |                                                                                                                                                                                                                                                                                                                                                                                                                                                                                                                 |
| Britto,M.T. 2000, Pediatr Pulmonol       | PA            |                                                                                                                                                                                                                                                                                                                                                                                    | No sign. diff. between CF and HC in participating ≥ 3/w in VPA (63% vs 67%; p=0.37)<br>No sign. diff. between CF and HC in participation in physical education class (59% vs 61%; p=0.81)<br>No sign. diff. between CF and HC in participating in community or school sports teams (52% vs 61%; p=0.10)<br>No sign. diff. in VPA (d/w) between CF and HC (3.5 vs 3.9) (t=1.32; p=0.187)<br>No sign. diff. in participation to strengthen or tone muscles (d/w) between CF and HC (2.6 vs 2.9) (t=0.90; p=0.368) |
|                                          | Age           |                                                                                                                                                                                                                                                                                                                                                                                    | No sign. diff. in decline of PA participation (i.e. VPA, PA education, sport team) among those aged ≥ 17 between CF and HC                                                                                                                                                                                                                                                                                                                                                                                      |
| Mackintosh, K.A. 2018, J Phys Act Health | PA            | Trend for ↑ LPA (min/d) in CF (222.7 (12.8) vs 207.3 (12.4)) (p>0.05)                                                                                                                                                                                                                                                                                                              | No sign. diff. in PA levels and patterns of accumulation between CF and HC                                                                                                                                                                                                                                                                                                                                                                                                                                      |
|                                          | Week vs WE    | Sign. ↑ levels of PA (LPA, MPA, MVPA) during weekdays compared to WE days in both groups (p’s<0.05)                                                                                                                                                                                                                                                                                |                                                                                                                                                                                                                                                                                                                                                                                                                                                                                                                 |
|                                          | PA guidelines |                                                                                                                                                                                                                                                                                                                                                                                    | No sign. diff. in meeting MVPA guidelines between CF and HC during weekdays and WE days (38.9% vs 44.4%; 30.6% vs 44.4% resp.) (p<0.05)                                                                                                                                                                                                                                                                                                                                                                         |
| Nixon, P.A. 2001, Med Sci Sports Exerc   | PA            | Sign. ↓ VPA (h/w) in CF (2.00 (2.5) vs 3.7 (2.8)) (p=0.014)                                                                                                                                                                                                                                                                                                                        | No sign. diff. in total PA (h/w) in past year between CF and HC (8.6 (6.4) vs 8.5 (5.6))<br>No sign. diff. in PA (MET h/w) between CF and HC (43.4 (32.6) vs 49.7 (31.3))                                                                                                                                                                                                                                                                                                                                       |
| Aznar,S. 2014, J Cyst Fibros             | PA            | Sign. diff. in all week PA between CF and HC:<br>- Sign. ↑ total PA (min/d) for CF (363 (85) vs 280 (58)) (p=0.001)<br>- Sign. ↑ LPA (min/d) for CF (319 (71) vs 226 (44)) (p=0.040)<br>- Sign. ↓ MVPA (min/d) for CF (44 (28) vs 54 (15)) (p=0.020)<br>- Sign. ↓ VPA (min/d) for CF (9 (6) vs 17 (9)) (p=0.001)<br>Sign. ↓ CF achieving MVPA guidelines (2.1% vs 34.4%) (p<0.001) |                                                                                                                                                                                                                                                                                                                                                                                                                                                                                                                 |
|                                          | ST            | Sign. ↓ ST time for CF for all week, week days and WE days (p’s< 0.001)                                                                                                                                                                                                                                                                                                            |                                                                                                                                                                                                                                                                                                                                                                                                                                                                                                                 |
| Mackintosh, K.A. 2019, J Sports Sci      | PA            |                                                                                                                                                                                                                                                                                                                                                                                    | No sign. diff. between CF and HC for:<br>- LPA (min/d) (225.5 (50.4) vs 220.6 (52.3))<br>- MVPA (min/d) (58.9 (36.9) vs 62.2 (30.3))                                                                                                                                                                                                                                                                                                                                                                            |

|                                                             |    |                                                                                                                                                    |                                                                                                                                                                                                                                                   |
|-------------------------------------------------------------|----|----------------------------------------------------------------------------------------------------------------------------------------------------|---------------------------------------------------------------------------------------------------------------------------------------------------------------------------------------------------------------------------------------------------|
|                                                             | ST |                                                                                                                                                    | No sign. diff in ST (min/d) between CF and HC (555.8 (59.9) vs 576.5 (69.9))                                                                                                                                                                      |
| Kilbride, E. 2012, ISRN pulmonology                         | PA |                                                                                                                                                    | No sign. diff. between CF and HC for PA (h/day): (boys 0.8 (0.2); girls 0.6 (0.2) vs boys 1.0 (0.1); girls 0.8 (0.1))<br>No sign. diff. between CF and HC for PA (METH/day): (boys 5.5 (1.1); girls 3.1 (0.9) vs boys 7.3 (0.6); girls 4.4 (0.4)) |
| Swisher A,K. 2007, Cardiopulm physical therapy J            | PA | Sign. ↓ PA (MET h/w) in CF (p=0.03)                                                                                                                | No sign. diff. in PA (h/w) between CF and HC (p=0.21)                                                                                                                                                                                             |
| Valencia-Peris A. 2021, Int. J. Environ. Res. Public Health | PA | Sign. ↑ CF regularly engaging in > 3 activities than HC (22.7% vs 4,4%) (p<0.05)                                                                   | No sign. diff. between CF and HC for:<br>- LPA (min/d): 240 (64) vs 230 (63)<br>- MPA (min/d): 39 (20) vs 41 (15)<br>- MVPA (min/d): 54 (31) vs 59 (27)<br>- VPA (min/d): 15 (13) vs 17 (15)                                                      |
| McNarry MA. 2021, Pediatr Pulmonol                          | PA | Sign. ↓ LPA (min/d) for CF (111.5 (59.0) vs 132.1 (57.5))<br>Sign. ↓ MVPA (min/d) for CF (9.6 (11.1) vs 17.1 (15.9))                               |                                                                                                                                                                                                                                                   |
| <b>Adults</b>                                               |    |                                                                                                                                                    |                                                                                                                                                                                                                                                   |
| Troosters,T. 2009, Eur Respir J                             | PA | Sign. ↓ MPA (min/d) for CF (14.8 (8.6-36.8) vs 34.5 (20.6-53.8)) (p=0.03)<br>Trend for ↓ VPA (min/d) in CF (p=0.09)                                | No sign. diff. in daily steps between CF and HC (9398 (6317-12970) vs 10281 (7928-12360))<br>No sign. diff. in # participants having < 7500 daily steps (35% CF vs 15% HC) (p=0.14)<br>No sign. diff. in LPA between CF and HC (p=0.37)           |
| Savi,D. 2013, Respir Med                                    | PA |                                                                                                                                                    | No sign. diff. in PA (SW accelerometer) between CF and HC<br>No sign. diff. in PA (Q) between CF and HC                                                                                                                                           |
| Cherobin, I.A. 2016                                         | PA | Sign. ↓ IPAQ levels for CF (NR) (p=0.035)                                                                                                          |                                                                                                                                                                                                                                                   |
| Buntain H.M. 2003, thorax                                   | PA | Sign. ↓ activity Q score in CF adults (3.2 (0.1) vs 3.7 (0.1)) (p=0.005)<br>Sign. ↓ total PA (h) in CF adults (30.6 (4.1) vs 53.2 (4.1)) (p<0.001) | No sign. diff. in activity Q score between CF and HC children (2.9 (0.1) vs 2.8 (0.1)) (p=0.41)<br>No sign. diff. in total PA (h) between CF and HC children (16.7 (1.8) vs 13.1 (1.4)) (p=0.12)                                                  |

|                                    |           |                                                                                                                                                                                                                                                                                                                                                                                                                                                                                                                                                                                                                      |                                                                                                                                                                                                                                                                                                                                                                                                        |
|------------------------------------|-----------|----------------------------------------------------------------------------------------------------------------------------------------------------------------------------------------------------------------------------------------------------------------------------------------------------------------------------------------------------------------------------------------------------------------------------------------------------------------------------------------------------------------------------------------------------------------------------------------------------------------------|--------------------------------------------------------------------------------------------------------------------------------------------------------------------------------------------------------------------------------------------------------------------------------------------------------------------------------------------------------------------------------------------------------|
| Rasekaba, T.M. 2013, J Cyst Fibros | PA        | <p>Sign. ↓ total IPAQ for CF (5309 (6277) vs 7808 (5493)) (p=0.011)</p> <p>Sign. ↓ work related PA (METmin/w) for CF (1887 (4285) vs 3707 (5292)) (p=0.003)</p> <p>Sign. ↓ transport related PA (METmin/w) for CF (613 (1018) vs 1315 (1123)) (p&lt;0.001)</p> <p>Sign. ↓ PA acquired from walking (METmin/w) for CF (1287 (1593) vs 2394 (2505)) (p=0.004)</p> <p>CF were ↓ likely to acquire their weekly PA through transport related activities compared to other domains (p&lt;0.001)</p> <p>3 activity types (walking, MPA and VPA), HC achieved a greater proportion of their total PA from VPA (p=0.001)</p> | <p>No sign. diff. in performing vigorous tasks at work between CF and HC (76% vs 88% resp.) (Chi-sq=1.95; df=1; p=0.197)</p> <p>CF had a similar contribution from all activity intensities (walking, MPA and VPA) (p=0.178)</p> <p>No sign. diff. in the proportion of participants achieving 150 min/w of walking, MPA or VPA (93% each group, p=0.97)</p>                                           |
|                                    | Sex       |                                                                                                                                                                                                                                                                                                                                                                                                                                                                                                                                                                                                                      | No sign. diff. between males and females on IPAQ total and domain scores (p's>0.05)                                                                                                                                                                                                                                                                                                                    |
|                                    | Diagnosis |                                                                                                                                                                                                                                                                                                                                                                                                                                                                                                                                                                                                                      | No sign. association between PA level (moderate or high) and diagnosis (CF vs non-CF) (p=0.22)                                                                                                                                                                                                                                                                                                         |
| Savi, D. 2015, BCM Pulm Med.       | PA        |                                                                                                                                                                                                                                                                                                                                                                                                                                                                                                                                                                                                                      | <p>No sign. diff. between CF and HC for:</p> <ul style="list-style-type: none"> <li>- Daily steps (9160.5 (3825.6) vs 9160.5 (3825.6)) (p=0.25)</li> <li>- LPA (min/d): (159 (100-246) vs 147 (77-205)) (p=0.22)</li> <li>- MPA (min/d): (13 (9-29) vs 11 (7-16)) (p=0.34)</li> <li>- MVPA (min/d): (16 (9-29) vs 12 (8-27)) (p=0.43)</li> <li>- VPA (min/d): (1 (0-3) vs 1 (0-5)) (p=0.94)</li> </ul> |
| <b>Mixed population</b>            |           |                                                                                                                                                                                                                                                                                                                                                                                                                                                                                                                                                                                                                      |                                                                                                                                                                                                                                                                                                                                                                                                        |
| Jantzen, A. 2016, Pediatr Pulmonol | PA        |                                                                                                                                                                                                                                                                                                                                                                                                                                                                                                                                                                                                                      | <p>No sign. diff. in PA performed on week and WE days between CF and HC (NR)</p> <p>No diff. in PA (h/d) between CF and HC for the total group (-0.15 (-0.32,0.02))</p>                                                                                                                                                                                                                                |
|                                    | Age       | Sign. ↓ time in at least strenuous PA (h/d) for CF children aged 6-13 y (Adj. diff activity -0.43 (95% CI -0.69 - -0.17))                                                                                                                                                                                                                                                                                                                                                                                                                                                                                            | No sign. diff. in at least strenuous PA (h/d) for children between 3-6 y and >13 y (-0.12 (-0.37,0.13); 0.21 (-0.12, 0.55))                                                                                                                                                                                                                                                                            |

CF, cystic fibrosis; Diff., difference; HC, healthy controls; LPA, light physical activity; MET, metabolic equivalent of Tasks; MPA, moderate physical activity; MVPA, moderate-to-vigorous physical activity; PA, physical activity; Sign., significant; VPA, vigorous physical activity; w, week; WE, weekend; #, number; <, less(er); ↓, lower; ↑, higher

Table E4. Results of included studies for research question 2

| Reference                              | Variable                           | significant                                                                                                                                                                                                                                                                                                                                                                                                                                                                                                                                                                                                  | non-significant                                                                                                                                                        |
|----------------------------------------|------------------------------------|--------------------------------------------------------------------------------------------------------------------------------------------------------------------------------------------------------------------------------------------------------------------------------------------------------------------------------------------------------------------------------------------------------------------------------------------------------------------------------------------------------------------------------------------------------------------------------------------------------------|------------------------------------------------------------------------------------------------------------------------------------------------------------------------|
| Tejero, ST. 2011, Chest                | VO <sub>2</sub> Peak               | Pos. association between VO <sub>2</sub> peak and:<br>- LPA (R=0.4) (p<0.05)<br>- MPA (R=0.38) (p<0.05)<br>- VPA (R=0.42) (p<0.05)                                                                                                                                                                                                                                                                                                                                                                                                                                                                           |                                                                                                                                                                        |
|                                        | 6MWT                               | Pos. association with LPA, MPA and VPA (R=0.36) (p<0.05)                                                                                                                                                                                                                                                                                                                                                                                                                                                                                                                                                     |                                                                                                                                                                        |
|                                        | BMD                                | Pos. association between Z score BMD lumbar column and LPA or MPA (R=0.36, p<0.01; R=0.59, p<0.001)<br>Pos. association between Z score BMD Femur neck and LPA or MPA (R=0.51, p<0.001; R=0.72, p<0.001)<br>Pos. association between Z score BMD total hip and LPA or MPA (R=0.54, p<0.001; R=0.74, p<0.001)                                                                                                                                                                                                                                                                                                 | No sign. association with daily steps (p=0.07)<br>No sign. association with VPA                                                                                        |
| Cox,S. 2019, J Cardiopulm Rehabil Prev | Sleep                              | Neg. association between WASO and MVPA (R=-0.337, p=0.020)<br>Pos. association between RT and MVPA (R=0.3, p=0.04)<br>Multi regression model (incl. age, sex, BMI and FEV1): WASO significant for predicting total PA and MVPA (R <sup>2</sup> =0.3; R <sup>2</sup> =0.26; p<0.02)<br>< WASO sign. independent predictor of ↑ total PA (bèta=-1.0, SE of bèta=-0.4, p=0.02) and tended toward sign. for predicting ↑ MVPA (bèta=-0.3; SE of bèta=-0.26, p=0.08)<br>All regression models predicting accumulation of 30min of MVPA throughout the day were sign. (R <sup>2</sup> =0.29-0.32, p's=0.007-0.014) | No sign. association between any sleep parameter and attainment of 30min MVPA<br>MVPA is not predicted by TST, SOL and SE (p=0.05 to p=0.70)                           |
| Boucher,G. 1997, Am J Phys Med Rehabil | Sex and BMP                        | Neg. association between AL and BMP in female CF (R=-0.466, p=0.033)                                                                                                                                                                                                                                                                                                                                                                                                                                                                                                                                         | No sign. sex difference in time spent "at least somewhat active" (P>0.1)                                                                                               |
|                                        | FEV1% and BMP                      | P with FEV1≥75%: pos. association between BMP and AL (R=0.675, p=0.023)                                                                                                                                                                                                                                                                                                                                                                                                                                                                                                                                      | No sign. association between FEV1% and AL<br>No sign. association between BMP and AL<br>P with sign. lung disease: AL was not related to lung function (R=0.21, p>0.1) |
|                                        | Perception AL child by the Parents | AL reported by parents was on average 24.1% ↓ than that reported by their children (R=0.758; p=0.004)<br>Neg. association between age of the child and AL reported by their parents (R=-0.633; p=0.027)                                                                                                                                                                                                                                                                                                                                                                                                      |                                                                                                                                                                        |
| Jantzen, A. 2016, PEDIATR Pulmonol     | Sex                                | Sign. ↓ VPA (h/d) for female P compared to male (1.0 h (0.76-1.34) vs 1.3 (0.98-1.58)(p=0.008))                                                                                                                                                                                                                                                                                                                                                                                                                                                                                                              |                                                                                                                                                                        |
|                                        | BMI                                |                                                                                                                                                                                                                                                                                                                                                                                                                                                                                                                                                                                                              | No sign. association with VPA                                                                                                                                          |
|                                        | ABPA, Pseudomonas                  |                                                                                                                                                                                                                                                                                                                                                                                                                                                                                                                                                                                                              | No sign. association with VPA                                                                                                                                          |

|                                           |                      |                                                                                                                                                                                                                                                                                                                                                                                                                                                                                                                   |                                                                                                                                                                                                                                                                                                                                                                                                                   |
|-------------------------------------------|----------------------|-------------------------------------------------------------------------------------------------------------------------------------------------------------------------------------------------------------------------------------------------------------------------------------------------------------------------------------------------------------------------------------------------------------------------------------------------------------------------------------------------------------------|-------------------------------------------------------------------------------------------------------------------------------------------------------------------------------------------------------------------------------------------------------------------------------------------------------------------------------------------------------------------------------------------------------------------|
|                                           | Aeruginosa or PI     |                                                                                                                                                                                                                                                                                                                                                                                                                                                                                                                   |                                                                                                                                                                                                                                                                                                                                                                                                                   |
|                                           | CFRDM                |                                                                                                                                                                                                                                                                                                                                                                                                                                                                                                                   | No sign. association with VPA                                                                                                                                                                                                                                                                                                                                                                                     |
|                                           | Sex, FEV1% and CFRLD | <p><b>Crude diff</b> in at least strenuous PA (h/d): sign. associations with strenuous to very strenuous PA and:</p> <ul style="list-style-type: none"> <li>- Sex (female) (-0.30, 95% CI (-0.58 to -0.02))</li> <li>- FEV1% (0.10, 95% CI (0.02 – 0.17))</li> <li>- CFRLD (-0.53, 95% CI (-1.05 - -0.000))</li> </ul> <p><b>Mutually adjusted model:</b> sign. association between FEV1% and strenuous to very strenuous PA (h/d) (0.08, 95% CI (0.01 – 0.16))</p>                                               | sensitivity analysis of multivariate model: no sign. association between FEV1% and PA (0.03, 95% CI (-0.03 - 0.10))                                                                                                                                                                                                                                                                                               |
| Gilljam,H.1990,<br>Respir Med             | Passive smoking      | <p>The active children had fewer days of hospital treatment than the less active (p&lt;0.02)</p> <p>Children with high PA living in families who smoked needed sign ↓ antibiotic treatment than the inactive children</p>                                                                                                                                                                                                                                                                                         |                                                                                                                                                                                                                                                                                                                                                                                                                   |
| Britto,M.T.2000,<br>pediatric pulmonology | Sex                  | Males were more likely than females to participate in team sports (X2 = 6.40, p=0.001)                                                                                                                                                                                                                                                                                                                                                                                                                            | males were more likely than females to report VPA, but the diff. was not sign.                                                                                                                                                                                                                                                                                                                                    |
|                                           | health status        | <p>Sign. association between CF who participated in VPA and health status (z=-3.70; p&lt;0.001)</p> <p>Sign. association between CF who participated in sport teams and health status (z=-3.16, p&lt;0.001)</p>                                                                                                                                                                                                                                                                                                   | Participation in physical education classes did not differ by health status (Z= -1.12, p=0.26)                                                                                                                                                                                                                                                                                                                    |
|                                           | Age                  | <p>For all the activities (i.e. vigorous PA, PA education, sport team), participation declined among those aged ≥ 17 y</p> <p>After adjusting for health status and gender:</p> <ul style="list-style-type: none"> <li>- young adolescents (&lt;14y) were 32 times more likely to participate in physical education classes than older adolescents</li> <li>- Drop in both VPA and sports team participation (OR = 4.5, 95% CI (1.7-12.1); OR = 6.5, 95% CI (2.3-18.5)) from early to late adolescence</li> </ul> |                                                                                                                                                                                                                                                                                                                                                                                                                   |
| Wells,G.D.2008,<br>Pediatr Pulmonol       | Sex                  |                                                                                                                                                                                                                                                                                                                                                                                                                                                                                                                   | <p>No sign. diff. between female and male activity levels measured by the HAES for either weekday (p=0.42) or WE (p=0.87)</p> <p>No sign. diff. between female and male activity levels measured by the activity diary for either weekday (p=0.69) or WE (p=0.74)</p> <p>No sign. diff. between female and male activity levels measured by the accelerometer for either weekday (p=0.19) or weekend (p=0.72)</p> |
| Cox, N.S. 2016,<br>Respirology            | Sex                  | <p>Sign. &gt; males undertook ≥30 MVPA daily (n=22 vs 11, P=0.02)</p> <p>Sign. &gt; PA in males compared to females at:</p> <ul style="list-style-type: none"> <li>- hospital discharge (median 74 min/d vs 11min/d, p=0.04)</li> <li>- 1m post discharge (median 24min/d vs 7min/d, p=0.02)</li> </ul>                                                                                                                                                                                                           |                                                                                                                                                                                                                                                                                                                                                                                                                   |

|                   |                                                                                                                                                                                                                                                                                                                                                                                                                                                                                                                                                                                                                                                                                                                                                                            |                                                                                                                                                  |
|-------------------|----------------------------------------------------------------------------------------------------------------------------------------------------------------------------------------------------------------------------------------------------------------------------------------------------------------------------------------------------------------------------------------------------------------------------------------------------------------------------------------------------------------------------------------------------------------------------------------------------------------------------------------------------------------------------------------------------------------------------------------------------------------------------|--------------------------------------------------------------------------------------------------------------------------------------------------|
| Disease severity  |                                                                                                                                                                                                                                                                                                                                                                                                                                                                                                                                                                                                                                                                                                                                                                            | No sign. diff. in MVPA across categories of disease severity ( $\chi^2(2)=1.89$ , $p=0.6$ )                                                      |
| Lung function     | <p>Sign. association between MVPA and FEV1 (absolute) at baseline (<math>R_s=0.4</math>, <math>p=0.004</math>)</p> <p>Sign. association between MVPA and FEV1 (absolute) at 12m (<math>R_s=0.4</math>, <math>p=0.006</math>)</p> <p>Sign. association between lung function and P who performed <math>\geq 30</math> MVPA daily at baseline (<math>p=0.01</math>)</p> <p>Sign. association between lung function and P who performed <math>\geq 30</math> MVPA daily at 12m (<math>p=0.001</math>)</p> <p>Sign. association between lung function and P who achieved MVPA-B at baseline (<math>P=0.03</math>)</p> <p>Sign. association between lung function and P who achieved MVPA-B at 12m (<math>P=0.02</math>)</p>                                                    |                                                                                                                                                  |
| Exercise capacity | <p>Sign. association between MVPA and exercise capacity (MST) at baseline (<math>R_s=0.4</math>, <math>p&gt;0.001</math>)</p> <p>Sign. association between MVPA and exercise capacity (MST) at 12m (<math>R_s=0.4</math>, <math>p=0.002</math>)</p> <p>Multiple linear regression model: exercise capacity was a sign independent predictor of whether <math>\geq 30</math> MVPA daily would be performed (standardized <math>\beta=0.59</math>, <math>p=0.002</math>)</p> <p>Sign. association between exercise capacity and P who performed <math>\geq 30</math> MVPA daily (BL <math>p&lt;0.001</math>, 12m <math>p=0.001</math>)</p> <p>Sign. association between exercise capacity and P who performed MVPA-B (BL <math>p=0.003</math>, 12m <math>p=0.006</math>)</p> |                                                                                                                                                  |
| Hospitalization   | <p>Effect of hospitalization: there was a 43% reduction in MVPA from discharge to 1m post discharge (<math>p=0.045</math>)</p> <p>Sign. association between MVPA and hospital admissions at 12m (<math>R_s=-0.3</math>, <math>p=0.05</math>; <math>R_s=-0.3</math>, <math>p=0.01</math>)</p> <p>Trend towards longer time to first admission when MVPA-B was achieved (<math>\chi^2(2)=3.06</math>, <math>p=0.08</math>)</p> <p>Sign. association between MVPA (incl. <math>\geq 30</math> MVPA daily and MVPA-B) and hospital time at 12 months (<math>P_t=0.04</math>; <math>P_t=0.04</math>)</p>                                                                                                                                                                        | No sign. diff. in time to first hospitalization between those who performed $\geq 30$ MVPA and those who did not ( $\chi^2(2)=2.18$ , $P=0.14$ ) |
| QoL               | Sign. $\uparrow$ scores for QoL in participants who performed $\geq 30$ MVPA daily and MVPA-B compared to those who performed $<30$ MVPA daily                                                                                                                                                                                                                                                                                                                                                                                                                                                                                                                                                                                                                             |                                                                                                                                                  |

|                                        |                                                           |                                                                                                                                                                                                                                                                                                                                                                                                                                                                                                                                               |                                                                                                                                                                                                                |
|----------------------------------------|-----------------------------------------------------------|-----------------------------------------------------------------------------------------------------------------------------------------------------------------------------------------------------------------------------------------------------------------------------------------------------------------------------------------------------------------------------------------------------------------------------------------------------------------------------------------------------------------------------------------------|----------------------------------------------------------------------------------------------------------------------------------------------------------------------------------------------------------------|
| Cherobin, I.A.<br>2018, Clin Respir J. | FEV1                                                      | Sign. association with: <ul style="list-style-type: none"> <li>- MPA (R2= 0.558, p&lt;0.001)</li> <li>- VPA (R2= 0.563, p&lt;0.001)</li> <li>- MVPA (R2= 0.623, p&lt;0.001)</li> <li>- MVPA (R2= 0.620, p&lt;0.001)</li> </ul> Sign. neg association with <ul style="list-style-type: none"> <li>- MVPA (r=0.723, p&lt;0.001)</li> <li>- data obtained by IPAQ (R=-0.282, p=0.073)</li> </ul>                                                                                                                                                 | Sign. association with: <ul style="list-style-type: none"> <li>- total METS (R2=0.80, p=0.146)</li> <li>- IPAQ classification (R2=0.81, p=0.141)</li> </ul>                                                    |
|                                        | thoracic kyphosis<br>cervical lordosis                    | Sign. association with MVPA and <ul style="list-style-type: none"> <li>- thoracic kyphosis (R=0.484, p=0.031)</li> <li>- cervical lordosis (R=0.531, p=0.016)</li> </ul>                                                                                                                                                                                                                                                                                                                                                                      |                                                                                                                                                                                                                |
|                                        | 6MWT                                                      | Sign. association with MVPA (R=0.564, p= 0.010)                                                                                                                                                                                                                                                                                                                                                                                                                                                                                               |                                                                                                                                                                                                                |
| Elce,A. 2018, Clin Respir J            | (Decline of) FEV1%                                        | P of the exercise group showed sign. slower decline of FEV1% compared to the CF sedentary group (p=0.04)                                                                                                                                                                                                                                                                                                                                                                                                                                      | No sign. diff. in current FEV1% between the two groups                                                                                                                                                         |
|                                        | SCL, P. aeruginosa, S. Malthophilia and B. cepacia, CFRLD |                                                                                                                                                                                                                                                                                                                                                                                                                                                                                                                                               | No sign. diff. in SCL, colonization by P. aeruginosa, S. maltophilia and B. cepacia and CFRLD between the two groups                                                                                           |
|                                        | PI                                                        |                                                                                                                                                                                                                                                                                                                                                                                                                                                                                                                                               | No sign. diff. in # of P with PI between the two groups (76.3% vs 72.9%)                                                                                                                                       |
|                                        | Anthropometric parameters                                 | Sign. higher # of P with altered BMI in the sedentary group (p=0.05)<br>Sign. higher # of P with increased waist circumference in the sedentary group. (p=0.03)<br>Sign. higher # of P with reduced arm circumference in the exercise group (p=0.03)                                                                                                                                                                                                                                                                                          | No sign. diff. in weight, height and BMI between the two groups<br>No sign. diff. in waist and arm circumferences between the two groups                                                                       |
|                                        | Biomechanical parameters                                  | Lipid metabolism: sign. ↓ in P of the exercise group: <ul style="list-style-type: none"> <li>- serum total cholesterol/HDL cholesterol ratio (p=0.05)</li> <li>- non - HDL cholesterol/HDL cholesterol ratios (p=0.05)</li> <li>- triglycerides (p=0.02)</li> </ul> Glucose metabolism: sign. ↑ levels of serum fasting glucose in P of the sedentary group (p=0.03), and in this group, we found a sign. ↑ # of P with impaired glucose tolerance (p=0.03)<br>Nutritional data: sign. ↑ levels of serum vitamin D in exercise group (p=0.05) | Lipid metabolism: no sign. diff. in plasma levels of campesterol and sitosterol between the two groups<br>Nutritional data: no sign. diff. in serum albumin, vitamin A and vitamin E levels between two groups |

|                                          |                      |                                                                                                                                                                                                                                                                                       |                                                                                                                                                                                                            |
|------------------------------------------|----------------------|---------------------------------------------------------------------------------------------------------------------------------------------------------------------------------------------------------------------------------------------------------------------------------------|------------------------------------------------------------------------------------------------------------------------------------------------------------------------------------------------------------|
| Mackintosh, K.A. 2018, J Phys Act Health | FEV1%                | FEV1 was predicted by height and LPA when both groups were pooled for analysis (F2.31=62.93, p<0.001, R2= 0.80)<br>Low LPA sign. predicted FEV1 (F2.31=68.07, p<0.001, R2=0.82)<br>both groups separately: FEV1 predicted by height and High LPA in CF (F2.14=79.60, p<0.001, R=0.92) |                                                                                                                                                                                                            |
| Troosters, T. 2009, Eur Respir J         | FEV1                 | Trend for an association between daily steps and lung function:<br>- FEV1 (R=0.39, P=0.08)<br>- FVC (R=0.42, p=0.07)                                                                                                                                                                  |                                                                                                                                                                                                            |
|                                          | Qc force             | Sign. association with:<br>- MPA (R=0.48, p=0.03)<br>- VPA (R=0.52, p=0.02)                                                                                                                                                                                                           | No sign. association with LPA or number of steps                                                                                                                                                           |
|                                          | VO <sub>2</sub> Peak | Sign. association with:<br>- MPA (R=0.56, p<0.02)<br>- VPA (R=0.52, p<0.02)<br>- Daily steps (R=0.47, p<0.05)                                                                                                                                                                         |                                                                                                                                                                                                            |
|                                          | 6MWT                 | Sign. association with VPA (R=0.45, p=0.04)                                                                                                                                                                                                                                           |                                                                                                                                                                                                            |
| Wieboldt, J. 2012, J Cyst Fibros         | Exacerbation         | Exacerbation group: sign. diff. in daily steps between discharge and 1m and between admission and 1m (p<0.008; p<0.001)                                                                                                                                                               | No sign. diff. in activity parameters and daily steps between CF stable and CF 1m post exacerbation (p=0.89)<br>Exacerbation group: no sign. diff. in daily steps between admission and discharge (p=0.13) |
|                                          | Anthropometrics      |                                                                                                                                                                                                                                                                                       | Total group (stable + acute exacerbation group): no sign. associations between daily steps and anthropometrics                                                                                             |
|                                          | Lung function        |                                                                                                                                                                                                                                                                                       | Total group (stable + acute exacerbation group): no sign. association between daily steps and lung function                                                                                                |
|                                          | Strength             |                                                                                                                                                                                                                                                                                       | Total group (stable + acute exacerbation group): no sign. associations between daily steps and any measure of strength                                                                                     |
|                                          | Blood parameters     |                                                                                                                                                                                                                                                                                       | Total group (stable + acute exacerbation group): no sign. associations between daily steps and any blood test parameter                                                                                    |
| Ward, N. 2013, Respir Med                | Exacerbation         | Sign. ↓ in ST from admission to one month following discharge (p<0.001), with a sign. ↑ in overall PA over time (p<0.001)                                                                                                                                                             | No sign. ↓ in ST from admission to one month discharge (p=0.4)                                                                                                                                             |
|                                          | age, FEV1, BMI       |                                                                                                                                                                                                                                                                                       | linear regression: change scores (baseline to followup) for PA and MST were not sign. affected by age, FEV1 or BMI (p>0.25)                                                                                |
|                                          | sex                  | Females had 78 min smaller ↑ in PA compared to males (p=0.055)                                                                                                                                                                                                                        |                                                                                                                                                                                                            |
| Thobani, A. 2015, Pulm Med               | FEV1                 | Sign. association between FEV1 and daily steps<br>- at baseline (R=0.39, p<0.04)<br>- at one-year (R=0.40, p=0.04)                                                                                                                                                                    |                                                                                                                                                                                                            |
| Nixon, P.A. 2001,                        | aerobic fitness      |                                                                                                                                                                                                                                                                                       | total CF group: no sign. associations between PA and aerobic fitness                                                                                                                                       |

|                          |                                  |                                                                                                                                                                                                                                                                                                                                                                                                                                                                                                                                                                                                                                               |                                                                                                                                                                                                                                   |
|--------------------------|----------------------------------|-----------------------------------------------------------------------------------------------------------------------------------------------------------------------------------------------------------------------------------------------------------------------------------------------------------------------------------------------------------------------------------------------------------------------------------------------------------------------------------------------------------------------------------------------------------------------------------------------------------------------------------------------|-----------------------------------------------------------------------------------------------------------------------------------------------------------------------------------------------------------------------------------|
| Med Sci Sports Exerc     | Pulmonary function               |                                                                                                                                                                                                                                                                                                                                                                                                                                                                                                                                                                                                                                               | total CF group: no sign. associations between PA and pulmonary function                                                                                                                                                           |
|                          | Body mass                        |                                                                                                                                                                                                                                                                                                                                                                                                                                                                                                                                                                                                                                               | total CF group: no sign. associations between PA and body mass                                                                                                                                                                    |
|                          | FEV1                             | P with FEV1<80%:<br>- sign. association between VPA and FEV1 (R=0.78, p=0.008)<br>- sign. association between METH/w and FEV1%, (R=0.72, p<0.019)                                                                                                                                                                                                                                                                                                                                                                                                                                                                                             | No sign. diff. in PA according to disease severity based on % of FEV1                                                                                                                                                             |
|                          | VO <sub>2</sub> peak             | P with FEV1<80%: sign. association between VPA and VO <sub>2</sub> peak (r=0.83, p=0.003)                                                                                                                                                                                                                                                                                                                                                                                                                                                                                                                                                     | No sign. association with METH/wk (R=0.19, p=0.603)                                                                                                                                                                               |
|                          | BMI                              |                                                                                                                                                                                                                                                                                                                                                                                                                                                                                                                                                                                                                                               | No sign. diff. in PA between P with BMI<90% and P with BMI ≥90%<br>Undernourished P: none of PA measures was related to aerobic fitness or pulmonary function<br>The degree of undernutrition (BMI% pred) was not related to PA   |
| Savi,D. 2013, Respir Med | VO <sub>2</sub> peak<br>Watt max | Sign. pos association between relative VO <sub>2</sub> peak and MPA (R=0.503, p=0.02), particularly during weekday (R=0.588, p=0.006)<br>Sign. association between absolute VO <sub>2</sub> peak and:<br>- MPA (r=0.503, p=0.02)<br>- MVPA (r=0.515, p=0.02)<br>Sign. association between VO <sub>2</sub> peak (% predicted) and weekday MPA (r=0.508, p=0.02)<br>Sign. association between Watt Max and weekday MPA (r=0.459, p=0.04)<br>Sign. association with VPA and VO <sub>2</sub> peak (R=0.545, p=0.01)<br>Sign. association with VPA and Watt Max (R=0.547, p=0.01)<br>CF achieving ≥ 30 min M(V)PA daily had ↑ VO <sub>2</sub> peak | No sign. association between VO <sub>2</sub> peak and weekdays and weekend activity categories detected by the HEAS<br><br>No sign. association between watt max and weekdays or weekend activity categories detected by the HEAS |
|                          | Max V'e                          | Sign. association with MPA during week and weekend (R=0.436, p=0.05; R=0.435, p=0.05)<br>Sign. association with VPA during week (R=0.568, p=0.008)                                                                                                                                                                                                                                                                                                                                                                                                                                                                                            |                                                                                                                                                                                                                                   |
|                          | 6MWT                             | Sign. association with daily steps (R=0.488, p=0.02)                                                                                                                                                                                                                                                                                                                                                                                                                                                                                                                                                                                          | No sign. associations with other PA outcome measurements                                                                                                                                                                          |
|                          | Week vs WE                       | Sign. ↑ “somewhat inactive” categories during weekday for CF (z=2.651, p=0.008)<br>Sign. ↑ “somewhat active” categories during WE for CF (z=-2.651, p=0.008)<br>Sign. ↑ total time spent in activity during WE for CF (z=-2.203, p=0.02)<br>Sign. ↑ total inactivity on weekdays for CF (z=2.464, p=0.01)<br>Trend for ↑ VPA during week compared to WE for CF (z=1.790, p=0.07)                                                                                                                                                                                                                                                              |                                                                                                                                                                                                                                   |

|                                                      |                            |                                                                                                                                                                                                                                                                                                                                                                                                                                                                                                                                                                                                                                                                       |                                                                                                                                                                                                                                                                                                                                         |
|------------------------------------------------------|----------------------------|-----------------------------------------------------------------------------------------------------------------------------------------------------------------------------------------------------------------------------------------------------------------------------------------------------------------------------------------------------------------------------------------------------------------------------------------------------------------------------------------------------------------------------------------------------------------------------------------------------------------------------------------------------------------------|-----------------------------------------------------------------------------------------------------------------------------------------------------------------------------------------------------------------------------------------------------------------------------------------------------------------------------------------|
| Loutzenhiser, J.K and Clark, R. 1993, J Pediatr Nurs | Exercise capacity          |                                                                                                                                                                                                                                                                                                                                                                                                                                                                                                                                                                                                                                                                       | No sign. association between activity scores and VO <sub>2</sub> max absolute (R=0.18)<br>No sign. association between activity scores and VO <sub>2</sub> max relative (R=0.16)                                                                                                                                                        |
| Baker, C.F. 2006, journal of pediatric nursing       | Sex                        | Sign. ↑ METH in hard intensity for boys (318.8 vs 97.4, Z=2.838, p=0.005)<br>Sign. ↑ total VPA METs (hard + very hard) in boys (531.6 vs 293.5, Z=2.1, p=0.036)<br>Trend for ↑ Total METH for boys at baseline (796.8 vs 555.2, Z=1.785, p=0.074)                                                                                                                                                                                                                                                                                                                                                                                                                     | Mean METH scores were higher for girls at LPA and were higher for boys at MPA and very hard intensities, but they were not sign. diff. (Z= -0.735, p=0.462; Z= -0.105, p=0.916)                                                                                                                                                         |
|                                                      | Attitudes PA               |                                                                                                                                                                                                                                                                                                                                                                                                                                                                                                                                                                                                                                                                       | Total sample:<br>- no association between attitude and METH (R=0.2, p=0.47)<br>- no association between attitude and (V)VPA (P=0.59)<br>No association between attitude and METH according to sex (Boys R=0.45, p=0.27; Girls R=0.3, p=0.47)<br>No association between attitude and (V)VPA according to sex (Boys P=0.23; Girls P=0.54) |
|                                                      | VO <sub>2</sub> Peak       | Sign. association with METH in (V)VPA (R=0.49, p=0.05)                                                                                                                                                                                                                                                                                                                                                                                                                                                                                                                                                                                                                |                                                                                                                                                                                                                                                                                                                                         |
| Wieltsback, M. 2020, PLoS One                        | Lung allograft dysfunction | Sign ↓ METmin/w for P with LAD compared to those without LAD (1796 (371 - 3067) vs 3372 (1613 - 6933) MET min/w, p=0.009)                                                                                                                                                                                                                                                                                                                                                                                                                                                                                                                                             |                                                                                                                                                                                                                                                                                                                                         |
| Hebestreit, H. 2014, BMC Pulm Med                    | Sex                        | Sign. sex difference in PA (h/w) at baseline (male 9.5 (10.6) vs female 5.8 (6.4), p<0.05)                                                                                                                                                                                                                                                                                                                                                                                                                                                                                                                                                                            |                                                                                                                                                                                                                                                                                                                                         |
|                                                      | QoL                        | Sign. association between the QoL scale "social role" and reported PA (R=0.292, p<0.05)                                                                                                                                                                                                                                                                                                                                                                                                                                                                                                                                                                               | No association between objectively measured PA and any QoL scale                                                                                                                                                                                                                                                                        |
| Hebestreit, H. 2006, Eur Respir J.                   | VO <sub>2</sub> max        | Sign. association between total daily accelerometer counts and relative VO <sub>2</sub> max (R=0.45, p<0.001)<br>Sign. association between total daily accelerometer counts and VO <sub>2</sub> max % predicted (R=0.32, p<0.01)<br>Sign. association between MVPA and relative VO <sub>2</sub> max (R=0.55, p<0.001)<br>Sign association between VO <sub>2</sub> max as % of predicted and MVPA (R=0.42, p<0.001)<br>Multiple linear regression:<br>- Sign. association between total accelerometer counts per day and VO <sub>2</sub> max (R=0.89, R <sup>2</sup> =0.79)<br>- Sign. association between MVPA and VO <sub>2</sub> max (R=0.89, R <sup>2</sup> =0.80) |                                                                                                                                                                                                                                                                                                                                         |
| Rasekaba, T.M.                                       | Sex                        |                                                                                                                                                                                                                                                                                                                                                                                                                                                                                                                                                                                                                                                                       | No sign. sex diff. on IPAQ total and domain scores (p>0.05)                                                                                                                                                                                                                                                                             |

|                                            |                      |                                                                                                                                                                                                                                                                                                                                                                                                                                                                                                                                           |                                                                                                                                                                       |
|--------------------------------------------|----------------------|-------------------------------------------------------------------------------------------------------------------------------------------------------------------------------------------------------------------------------------------------------------------------------------------------------------------------------------------------------------------------------------------------------------------------------------------------------------------------------------------------------------------------------------------|-----------------------------------------------------------------------------------------------------------------------------------------------------------------------|
| 2013, journal of Cystic Fibrosis           | Age                  | CF females: sign. association between PA accumulated from domestic activities and age (R=0.55, P=0.005)                                                                                                                                                                                                                                                                                                                                                                                                                                   | No sign. diff. in age between the CFs in the high and low PA category<br>CF males: no association between HPA intensity category and demographic features such as age |
|                                            | BMI                  | CF Females: sign association between MPA and BMI (R=-0.47, P=0.022)                                                                                                                                                                                                                                                                                                                                                                                                                                                                       | No sign. diff. in BMI between the CFs in the high and low PA category<br>CF males: no association between PA intensity category and demographic features such BMI     |
|                                            | Lung function        | Sign. pos. association between PA and respiratory function (Rs 0.18-0.23, p<0.05)<br>CF Females: sign association between VPA and FEV1% (R=0.34, p<0.05)                                                                                                                                                                                                                                                                                                                                                                                  | No sign. diff. in lung function between the CFs in the high and low PA category                                                                                       |
| Tejero, S. 2016, Braz J Phys Ther          | Sex                  | Sign. ↑ MPA for CF male (p=0.045)                                                                                                                                                                                                                                                                                                                                                                                                                                                                                                         |                                                                                                                                                                       |
|                                            | BMD                  | Sign. pos. association between: <ul style="list-style-type: none"> <li>- MPA and total hip BMD (R=0.74, p&lt;0.001)</li> <li>- MPA and femoral neck BMD (R=0.72, p&lt;0.001)</li> <li>- MPA and Lumbar spine BMD (R=0.58, p&lt;0.001)</li> <li>- VPA and Total hip BMD (R=0.49, p&lt;0.001)</li> <li>- VPA and femoral neck BMD (R=0.34, p=0.016)</li> <li>- MPA and P1NP (R=0.35, p=0.013)</li> <li>- VPA and P1NP (R=0.42, p = 0.003)</li> <li>- MPA and PICP (R=0.32, p=0.023)</li> <li>- VPA and PICP (R=0.53, p&lt;0.001)</li> </ul> |                                                                                                                                                                       |
| Aznar, S. 2014, journal of Cystic Fibrosis | VO <sub>2</sub> Peak | Sign. association with <ul style="list-style-type: none"> <li>- all week MVPA (R=0.46, p=0.003)</li> <li>- all week VPA (R=0.39, p&lt;0.05)</li> <li>- week MVPA (R=0.41, p=0.009)</li> <li>- WE MVPA (R=0.39, p&lt;0.05)</li> <li>- Week VPA (R=0.38, p&lt;0.05)</li> <li>- WE VPA (R=0.35, p&lt;0.05)</li> </ul>                                                                                                                                                                                                                        |                                                                                                                                                                       |
| Paranjape, S.M. 2012, J Cyst Fibros.       | Week vs WE           | Sign. ↑ self - reported activity on typical WE than on weekdays (median 63.2% vs 55.7%, p=0.004)                                                                                                                                                                                                                                                                                                                                                                                                                                          |                                                                                                                                                                       |
| Schneiderman-                              | sex                  | Sign. ↑ weekday total activity for male (5.4 (2.5) vs 6.5 (2.9), p<0.05)                                                                                                                                                                                                                                                                                                                                                                                                                                                                  |                                                                                                                                                                       |

|                                 |                        |                                                                                                                                                                                                                                                                                                                                                                                                              |                                                                                                                                                                                                                                                                                                                                     |
|---------------------------------|------------------------|--------------------------------------------------------------------------------------------------------------------------------------------------------------------------------------------------------------------------------------------------------------------------------------------------------------------------------------------------------------------------------------------------------------|-------------------------------------------------------------------------------------------------------------------------------------------------------------------------------------------------------------------------------------------------------------------------------------------------------------------------------------|
| Walker, J. 2005, J Pediatr      | FEV1                   | Sign. association between activity quartile and FEV1, significantly dependent on sex (p=0.02)<br><br>Girls:<br>- Sign. association between weekday total activity quartiles and rate of decline in FEV1 (p=0.02)<br>- Sign. more rapid rate of decline in FEV1 for girls in the two lowest activity quartiles compared to those in the two highest quartiles (-3.4%, -3.05% pred; 0.93%, 1.17% pred; p=0.02) | Boys: no sign. association between weekday total activity quartiles and rate of decline in FEV1 (p=0.86)                                                                                                                                                                                                                            |
|                                 | Season                 | Seasonal averages of weekday total activity (h/d) for summer, fall, winter and spring were: 7.13 (3.2), 4.53 (2.7), 4.86 (2.6) and 4.81 (2.4) (p<0.001), with more active time in summer                                                                                                                                                                                                                     | No diff. in weekday very active (h/d) across seasons (average range 1.8 to 2.5 (1.4 – 2.3)                                                                                                                                                                                                                                          |
| Quon, B.S. 2012, J Cyst Fibros. | Health status          | Sign. ↑ mean pedometer-recorded step rate during the well state compared to the ill state (increased 35% or 137 steps/h, p=0.015)                                                                                                                                                                                                                                                                            | No sign. diff. in lung function of P whose mean step rate decreased from the ill to the well period (p=0.11)                                                                                                                                                                                                                        |
|                                 | Sex                    |                                                                                                                                                                                                                                                                                                                                                                                                              | No sign. diff. in mean step rate between sexes (mean diff. 78 steps/h)                                                                                                                                                                                                                                                              |
|                                 | lung function          | Well period: mean step rate increased by 9.4 steps/h with every 1 unite increase in baseline FEV1 predicted (R=0.53, p=0.014)                                                                                                                                                                                                                                                                                |                                                                                                                                                                                                                                                                                                                                     |
|                                 | Age                    | Well period: sign. ↑ mean step rate for adolescents compared to adults (377 steps/h higher)                                                                                                                                                                                                                                                                                                                  |                                                                                                                                                                                                                                                                                                                                     |
| Savi,D. 2015, BCM Pulm Med.     | sex                    | Sign. > average METs for men (1.6 (0.2) vs 1.8 (0.3), p<0.05)<br>Sign. > VPA for men (p=0.01)                                                                                                                                                                                                                                                                                                                | No sign. diff. in MPA between female and male (10 (6-24) min vs 19 (9-33) resp., p=0.16)<br>No sign. diff. in total PA duration between female and male (184 (115) vs 233 (149), p=0.17)                                                                                                                                            |
|                                 | Pulmonary exacerbation | Sign. ↓ Daily Pa in P with > 2 exacerbations/y (p=0.01)<br>Sign. ↓ LPA in P with > 2 exacerbations/y (p=0.01)<br>Sign. ↓ average METs in those with > frequent exacerbations (p=0.01)                                                                                                                                                                                                                        | No sign. diff. for activities with at least moderate and vigorous intensity among the three groups (p=0.3; p=0.88)<br>No sign. association the # of exacerbations in the preceding year and PA variables when corrected for clinical covariates (age, sex, BMI, FEV1% pred, infection with P aeruginosa, genotype, diabetes and PI) |
|                                 | Seks FEV1%             | Daily PA was independently associated with sex and airflow obstruction (NR)<br>PA above threshold of moderate and vigorous intensity were also related to sex and FEV1% pred (p=0.007, p=0.04)<br>Trend towards lower number of steps in those with lower FEV1% pred (p=0.09)                                                                                                                                |                                                                                                                                                                                                                                                                                                                                     |
| Schneiderman, J.E. 2014, Eur    | sex                    | Sign. ↑ PA for males compared to females (5.06 (2.69) vs 5.9 (2.87), p=0.028)                                                                                                                                                                                                                                                                                                                                |                                                                                                                                                                                                                                                                                                                                     |

|                             |                                  |                                                                                                                                                                                                                                                                                                                                                                                                                             |                                                                                                                                                                                                                                                                                                                                                                                                                                       |
|-----------------------------|----------------------------------|-----------------------------------------------------------------------------------------------------------------------------------------------------------------------------------------------------------------------------------------------------------------------------------------------------------------------------------------------------------------------------------------------------------------------------|---------------------------------------------------------------------------------------------------------------------------------------------------------------------------------------------------------------------------------------------------------------------------------------------------------------------------------------------------------------------------------------------------------------------------------------|
| Respir J.                   | follow up                        | Adjusting for the potential confounders of sex, baseline age and FEV1, mucoid P. aeruginosa and CFRD: sign. ↑ in PA of 0.28 (0.03) h/d per y (p<0.0001) over the study period                                                                                                                                                                                                                                               |                                                                                                                                                                                                                                                                                                                                                                                                                                       |
|                             | VO <sub>2</sub> peak             |                                                                                                                                                                                                                                                                                                                                                                                                                             | No sign. association between VO <sub>2</sub> peak and PA (p=0.7457)                                                                                                                                                                                                                                                                                                                                                                   |
|                             | FEV1%                            | ↑ in activity was associated with a slower rate of ↓ in lung function over the study period (R=0.19, p<0.007)<br>Mixed model analysis results: sign. less steep rate of ↓ of FEV1 for the high group compared to the low group (-1.39% pred/y vs -1.90% pred/y, p=0.0001)<br>Sign. less steep rate of ↓ in FEV1 for P who increased their HPA compared to those with reduced HPA (-0.58% pred/y vs -2.15% pred/y, p=0.0231) |                                                                                                                                                                                                                                                                                                                                                                                                                                       |
|                             | confounders vs high/low activity |                                                                                                                                                                                                                                                                                                                                                                                                                             | No sign. diff. in the following confounders between P in the high and low PA group: ABPA (p=0.4101), mPA (p=0.2800), CFRD (p=0.5717), PI (p=0.1534), female sex (p=0.3375), age (p=0.5367), FVC% pred (p=0.2098), FEV1% pred (p=0.0967), z-BMI (p=0.1397), FEF25-75% (p=0.2192)<br><br>the high group had a rate of ↑ in PA of 0.59 h/d per y, the low group had a rate of ↓ of activity of 0.15 h/d per y over the study period (NR) |
| Savi, D. 2018, BCM Pulm Med | DH                               | Sign. ↑ time in PA above vigorous I for P with evidence of DH (p=0.01)                                                                                                                                                                                                                                                                                                                                                      | A trend for ↑ time in PA above moderate I in the DH group (p=0.196)                                                                                                                                                                                                                                                                                                                                                                   |
|                             | VO <sub>2</sub> peak             | Total group:<br>- Sign. association between MPA and VO <sub>2</sub> peak (absolute) (R=0.44, p=0.002)<br>- Sign. association between MPA and VO <sub>2</sub> peak (relative) (R=0.52, p<0.001)<br>Multivariate linear regression: VO <sub>2</sub> peak and gender as independent predictor of PA                                                                                                                            |                                                                                                                                                                                                                                                                                                                                                                                                                                       |
| Savi, D. 2015, BCM Pulm Med | VO <sub>2</sub> peak<br>Watt Max | Sign. association between MPA and VO <sub>2</sub> peak (relative) (R=0.49, p=0.005)<br>Sign. association between MVPA and VO <sub>2</sub> peak (absolute) (R=0.41, p=0.02)<br>Sign. association between MVPA and VO <sub>2</sub> peak (relative) (R=0.51, p=0.003)<br>Time spent in MVPA was correlated to Watt max (R=0.35, p=0.05)                                                                                        |                                                                                                                                                                                                                                                                                                                                                                                                                                       |
| Ruf, K.C. 2012, BMC Med Res | Sex                              | Sign. ↑ MVPA in males compared to females (70.8 (35.4) vs 97.2 (36.5))<br>Sign. ↑ VPA in males compared to females (28.6 (14.1) vs 47.7 (24.7))                                                                                                                                                                                                                                                                             | No sign. diff. between sexes in PA assessed by the questionnaires<br>No sign. diff. in MPA between sexes                                                                                                                                                                                                                                                                                                                              |

|                                       |                                  |                                                                                                                                                                                                                                                                                                                                                                                                                                                                       |                                                                                                                                                                                                                                                      |
|---------------------------------------|----------------------------------|-----------------------------------------------------------------------------------------------------------------------------------------------------------------------------------------------------------------------------------------------------------------------------------------------------------------------------------------------------------------------------------------------------------------------------------------------------------------------|------------------------------------------------------------------------------------------------------------------------------------------------------------------------------------------------------------------------------------------------------|
| Methodol                              | VO <sub>2</sub> peak<br>Watt Max | Sign. moderate association between LRC showed and Wmax (R=0.46, p=0.002)<br>Sign. weak association between LRC and VO <sub>2</sub> peak (R=0.32, p=0.041)                                                                                                                                                                                                                                                                                                             | No sign. Association between results of the exercise test and the results of the HAES and 7D PAR (data not shown)                                                                                                                                    |
| Burtin, C. 2013, Resp Research        | Exacerbation                     | Sign. ↓ daily steps and time in M(V)PA during exacerbation (p<0.05)                                                                                                                                                                                                                                                                                                                                                                                                   |                                                                                                                                                                                                                                                      |
|                                       | Hospital vs home                 |                                                                                                                                                                                                                                                                                                                                                                                                                                                                       | No sign. diff in PA between P receiving IVAT in hospital vs IVAT at home<br>- Hospital: 4283 (3276-5629) steps/d and 6 (2-17) min spent in activities > 4.8 METs<br>- Home: 3517 (2411-7468) steps/d and 4 (2-18) min spent in activities > 4.8 METs |
|                                       | Sex                              |                                                                                                                                                                                                                                                                                                                                                                                                                                                                       | No diff. in activity levels between sexes (NR)                                                                                                                                                                                                       |
|                                       | Qc force                         | Sign. association between Qc twitch force and MPA during exacerbation (R=0.61, p=0.007)<br>70% of P who spent <10min/d MPA showed a decrease in Qc twitch force, compared to 25% of P with > MPA (p=0.057)                                                                                                                                                                                                                                                            | No sign. association between Qc twitch force and daily number of steps (R=-0.15, p=0.55)<br>No sign. association between PA and Max voluntary contraction during exacerbation:<br>- MPA (R=0.29, p=0.24)<br>- Daily steps (R=-0.009, p=0.72)         |
| Orava, C. 2018, physiotherapy Canada  | Fatigue                          | Controlling for FEV1 and depression:<br>- sign. negative association between general fatigue and total active hours (bêta=-0.735, p=0.003)<br>- Trend towards negative association between # of total active hours and score on physical fatigue (bêta=-0.579, p=0.09)                                                                                                                                                                                                | No sign. association between total activity hours and the scores from the five different fatigue domains                                                                                                                                             |
| Currie, S. 2017, physiotherapy Canada | CDA guidelines                   | Sign. ↑ METmin/w for P achieving CDA guidelines compared to those who do not (p=0.05)<br>Trend towards a diff. in the amount of sleep between P achieving CDA guidelines and those who do not (p=0.07)                                                                                                                                                                                                                                                                | no sign. diff in blood glucose control between adults with CFRD who met the CDA guidelines and those who did not (p=0.34)                                                                                                                            |
| Kilbride, E. 2012, ISRN pulmonoly     | sex                              |                                                                                                                                                                                                                                                                                                                                                                                                                                                                       | No sign. diff. in PA between boys and girls                                                                                                                                                                                                          |
| Cherobin, I.A. 2016                   | classification PA                | Sign. more HC were classified as high physically active compared to CF (0 vs 6 patients) IPAQ score                                                                                                                                                                                                                                                                                                                                                                   | Participants categorized as mild or moderate PA: no sign diff between CF and HC for the following variables: age, BMI, FEV1 6MWT...                                                                                                                  |
| Bhudhikanok, G.S. 1996, pediatrics    |                                  | Sign. pos. correlation between intensity of physical exertion (MET score) and bone mass at all sites except femoral neck BMAD<br>Sign. correlation between time spent in weight bearing activity and lumbar spine BMAD<br>trend for correlation between time spent in weight bearing activity and lumbar spine BMD<br>Sign. weak correlations between time spent in weight bearing activity (excl walking) and BMD z scores both at the lumbar spine and femoral neck | No sign. association between bone mass at any site and time spent in exercise and time spent in weight bearing activity (excl walking)                                                                                                               |

|                                                             |        |                                                                                                                                                                                                                                                                                                                                                                                                                                                                                                                                                                                                                                                                                                                                                                                                                                                                                       |                                                                                                                                                       |
|-------------------------------------------------------------|--------|---------------------------------------------------------------------------------------------------------------------------------------------------------------------------------------------------------------------------------------------------------------------------------------------------------------------------------------------------------------------------------------------------------------------------------------------------------------------------------------------------------------------------------------------------------------------------------------------------------------------------------------------------------------------------------------------------------------------------------------------------------------------------------------------------------------------------------------------------------------------------------------|-------------------------------------------------------------------------------------------------------------------------------------------------------|
| Burton, K. 2019, physio theory and practice                 | plasma | <p>Sign. association between daily average METS and plasma concentrations of</p> <ul style="list-style-type: none"> <li>- Interleukine 6 (<math>r=-0,48</math>; <math>p&lt;0,02</math>)</li> <li>- Interleukine 8 (<math>r=-0,5</math>; <math>p&lt;0,01</math>)</li> <li>- Tumor necrosis factor alfa (<math>r=-0,47</math>, <math>p&lt;0,01</math>)</li> </ul> <p>Sign. low negative correlation with daily average <math>\geq 3</math> METs and plasma concentrations of:</p> <ul style="list-style-type: none"> <li>- Interleukine 6 (<math>R=-0.4</math>, <math>p=0.02</math>)</li> <li>- InterLeukine 8 (<math>R=-0.37</math>; <math>p=0.04</math>)</li> <li>- Tumor Necrosis Factor alfa (<math>R=-0.4</math>, <math>p=0.03</math>)</li> </ul> <p>Sign. low positive correlation between sputum TNF alfa and daily average steps (<math>R=0.36</math>, <math>p=0.05</math>)</p> | <p>No sign. association between plasma cytokines and daily average steps</p> <p>No sign. associations between sputum cytokines and measures of PA</p> |
|                                                             | FEV1   | Sign. association between daily average steps and FEV1 ( $R=0.45$ , $p<0.05$ )                                                                                                                                                                                                                                                                                                                                                                                                                                                                                                                                                                                                                                                                                                                                                                                                        |                                                                                                                                                       |
|                                                             | Sex    |                                                                                                                                                                                                                                                                                                                                                                                                                                                                                                                                                                                                                                                                                                                                                                                                                                                                                       | No sign. diff. in PA between sexes                                                                                                                    |
|                                                             | BMI    | Sign. low positive correlation between BMI and daily average steps ( $R=0.39$ , $p<0.05$ )                                                                                                                                                                                                                                                                                                                                                                                                                                                                                                                                                                                                                                                                                                                                                                                            |                                                                                                                                                       |
| Buntain H.M. 2003, thorax                                   | BMD    | <p>Children: sign. pos. univariate associations between activity questionnaire score and:</p> <ul style="list-style-type: none"> <li>- Principal component BMD</li> <li>- LS BMD</li> </ul> <p>Adults: sign. association between principal component BMD and activity questionnaire score</p> <p>Sign. association between LS BMD and:</p> <ul style="list-style-type: none"> <li>- the activity questionnaire score</li> <li>- PA/sedentary ratio</li> </ul> <p>Multivariate model: activity questionnaire score was the only predictor of LS BMD</p>                                                                                                                                                                                                                                                                                                                                |                                                                                                                                                       |
| Valencia-Peris A. 2021, Int. J. Environ. Res. Public Health | Sex    | <p>Sign. <math>\uparrow</math> MPA in boys (30 (13) vs 49 (22))</p> <p>Sign. <math>\uparrow</math> VPA in boys (10 (7) vs 20 (17))</p> <p>Sign. <math>\uparrow</math> MVPA in boys (40(19) vs 70(36))</p> <p>(<math>P's&lt;0.001</math>)</p>                                                                                                                                                                                                                                                                                                                                                                                                                                                                                                                                                                                                                                          |                                                                                                                                                       |
|                                                             | age    | Sign. diff. in PA between younger children (6-9 y) older children (14-17 y) (67 min/d vs 40 min/d)                                                                                                                                                                                                                                                                                                                                                                                                                                                                                                                                                                                                                                                                                                                                                                                    |                                                                                                                                                       |
| Groeneveld I.F. 2012, Qual Life Res                         | QoL    |                                                                                                                                                                                                                                                                                                                                                                                                                                                                                                                                                                                                                                                                                                                                                                                                                                                                                       | No sign. associations between PA and HRQoL                                                                                                            |

AL, activity level; BMD, bone mineral density; BMI, body mass index; CFRDM, cystic fibrosis related diabetes mellitus; CFRLD, cystic fibrosis related liver disease; d, day; DH, dynamic hyperinflation; diff., difference; FEV1, forced expiratory volume in one second; h, hour; HAES, habitual activity estimation scale; I, intensity; incl., inclusive; IPAQ, international physical activity questionnaire; LPA, light physical activity; m, months; Max., maximal; MET, metabolic equivalent of task; min, minute; MPA, moderate physical activity; MST, modified shuttle test; MVPA, moderate-to-vigorous physical activity; neg., negative; NR, not reported; PA, physical activity; PI, pancreatic insufficiency; pos., positive; Qc, quadriceps; QoL, quality of life; sign., significant; ST, sedentary time; (V)VPA, (very) vigorous physical activity; w, weeks; WASO, wakefulness after sleep onset; WE, weekend; y, year; 6MWT, six-minute walking test; #, number; ↑, higher/increase; ↓, lower/decline

Table E5. Qualitative synthesis of included studies using NOS scale for the quality of cohort studies included in research question 1.

| Study                         | Items     |   |   |               |          |   | LoE |
|-------------------------------|-----------|---|---|---------------|----------|---|-----|
|                               | Selection |   |   | Comparability | Exposure |   |     |
|                               | 1         | 2 | 3 | 5             | 6        | 7 |     |
| Aznar,S. et al. 2014          | +         | + | - | -             | +        | + | B   |
| Britto,M.T. et al. 2000       | +         | + | + | +             | -        | - | B   |
| Buntain H.M. et al. 2003      | +         | + | + | +             | -        | - | B   |
| Cherobin, I.A. et al. 2016    | +         | + | + | +             | -        | - | B   |
| Jantzen, A. et al. 2016       | +         | + | + | -             | +        | + | B   |
| Kilbride, E. et al. 2012      | +         | + | + | -             | -        | - | C   |
| Mackintosh, K.A. et al. 2018  | +         | + | + | +             | +        | + | B   |
| Mackintosh, K.A. et al 2019   | +         | + | + | +             | +        | + | B   |
| McNarry et al.                | +         | + | + | +             | +        | + | B   |
| Nixon, P.A. et al. 2001       | +         | + | - | -             | -        | - | C   |
| Rasekaba, T.M. et al. 2013    | +         | + | - | -             | -        | - | C   |
| Savi,D. et al. 2013           | +         | + | - | +             | +        | - | B   |
| Savi,D. et al. 2015           | +         | + | - | +             | +        | - | B   |
| Swisher A,K. et al. 2007      | +         | + | + | +             | -        | - | B   |
| Troosters,T. et al. 2009      | +         | + | - | +             | +        | - | B   |
| Valencia-Peris A. et al. 2021 | +         | + | + | +             | +        | + | B   |

Newcastle-Ottawa Quality Assessment Scale (NOS) for cohort studies: Selection of cohort(s): 1: Representativeness of the exposed cohort; 2: Selection of the non-exposed cohort; 3: Ascertainment of exposure; 5: Comparability of cohorts; 6: Assessment of outcome; 7: Follow up long enough for outcomes to occur; +, yes; -, no; LoE, level of evidence

Table E6. Qualitative synthesis of included studies using NOS scale for the quality of cohort studies included in research question 2.

| Study                           | Items     |   |          |   |   | LoE |
|---------------------------------|-----------|---|----------|---|---|-----|
|                                 | Selection |   | Exposure |   |   |     |
|                                 | 1         | 3 | 6        | 7 | 8 |     |
| Tejero et al. 2011              | +         | + | +        | - | - | C   |
| Cox et al. 2019                 | +         | - | +        | + | - | C   |
| Boucher et al. 1997             | +         | - | -        | - | - | C   |
| Gilljam et al. 1990             | +         | - | -        | - | - | C   |
| Wells et al. 2008               | +         | - | +        | + | - | C   |
| Cox et al. 2016                 | +         | - | +        | - | - | C   |
| Cherobin et al. 2018            | +         | + | +        | - | - | C   |
| Elce et al. 2018                | +         | + | -        | - | + | B   |
| Wieboldt et al. 2012            | +         | - | +        | + | + | B   |
| Ward et al. 2013                | +         | - | +        | - | + | B   |
| Thobani et al. 2015             | +         | - | +        | - | + | B   |
| Baker et al. 2006               | +         | - | -        | - | - | C   |
| Loutzenhisser et al. 1993       | +         | - | -        | - | - | C   |
| Wieltsback et al. 2020          | +         | - | -        | - | - | C   |
| Hebestreit et al. 2014          | +         | - | +        | + | - | C   |
| Hebestreit et al. 2006          | +         | - | +        | + | - | C   |
| Tejero et al. 2016              | +         | + | +        | - | - | C   |
| Schneiderman-Walker et al. 2005 | +         | - | -        | - | + | A2  |
| Paranjape et al. 2012           | +         | - | -        | - | - | C   |
| Quon et al. 2012                | +         | + | +        | + | - | C   |
| Schneiderman et al. 2014        | +         | - | -        | - | + | A2  |
| Savi et al. 2018                | +         | + | +        | - | - | C   |
| Savi et al. 2015                | +         | + | +        | - | - | B   |
| Ruf et al. 2012                 | +         | + | +        | + | - | C   |
| Burtin et al. 2013              | +         | + | +        | + | + | B   |
| Orava et al. 2018               | +         | + | -        | - | - | C   |
| Currie et al. 2017              | +         | + | -        | - | - | C   |
| Bhudhikanok et al. 1996         | +         | + | -        | - | - | C   |
| Burton et al. 2019              | +         | - | +        | - | + | B   |
| Groeneveld et al. 2012          | +         | + | +        | ? | - | C   |

Newcastle-Ottawa Quality Assessment Scale (NOS) for cohort studies: Selection of cohort(s): 1: Representativeness of the exposed cohort; 3: Ascertainment of exposure; 6: Assessment of outcome; 7: Follow up long enough for outcomes to occur; 8: Adequacy of follow up of cohorts. +, yes; -, no; ?, not reported; LoE, level of evidence
